# Across the great divide: revision of the genus *Eupetaurus* (Sciuridae: Pteromyini), the woolly flying squirrels of the Himalayan region, with the description of two new species

STEPHEN M. JACKSON<sup>1,2,3,4,□</sup>, QUAN LI<sup>5,6,□</sup>, TAO WAN<sup>5,7,8</sup>, XUE-YOU LI<sup>5</sup>, FA-HONG YU<sup>9</sup>, GE GAO<sup>10</sup>, LI-KUN HE<sup>11</sup>, KRISTOFER M. HELGEN<sup>4,\*</sup> and XUE-LONG JIANG<sup>5,\*</sup>

<sup>1</sup>Vertebrate Pest Research Unit, NSW Department of Primary Industries, Orange Agricultural Institute, 1447 Forest Road, Orange, NSW 2800, Australia

<sup>2</sup>School of Biological, Earth and Environmental Sciences, University of New South Wales, Sydney, NSW 2052, Australia

<sup>3</sup>Division of Mammals, National Museum of Natural History, Smithsonian Institution, Washington, DC 20013-7012, USA

<sup>4</sup>Australian Museum Research Institute, Australian Museum, 1 William Street, Sydney, NSW 2010, Australia

<sup>5</sup>State Key Laboratory of Genetic Resources and Evolution, Kunming Institute of Zoology, Chinese Academy of Sciences, Kunming, Yunnan, China

<sup>6</sup>Kunming College of Life Science, University of Chinese Academy of Sciences, Kunming, Yunnan 650201, China

<sup>7</sup>College of Life Sciences, Sichuan Normal University, Chengdu 610066, China

<sup>8</sup>College of Life Sciences, Shaanxi Normal University, Xi'an, Shaanxi 710119, China

<sup>9</sup>Interdisciplinary Center for Biotechnology Research, University of Florida, Gainesville, FL 32610, USA

<sup>10</sup>Baoshan Management Bureau of Gaoligongshan National Nature Reserve, Baoshan, Yunnan 678000, China

<sup>11</sup>Gongshan Management Bureau of Gaoligongshan National Nature Reserve, Gongshan, Yunnan 673500, China

Received 14 August 2020; revised 1 March 2021; accepted for publication 10 March 2021

The woolly flying squirrel, *Eupetaurus cinereus*, is among the rarest and least studied mammals in the world. For much of the 20<sup>th</sup> century it was thought to be extinct, until it was rediscovered in 1994 in northern Pakistan. This study outlines the first taxonomic and biogeographical review of the genus *Eupetaurus*, which until now has contained only a single species. Careful review of museum specimens and published records of *Eupetaurus* demonstrates that the genus occurs in three widely disjunct areas situated on the western (northern Pakistan and north-western India), north-central (south-central Tibet, northern Sikkim and western Bhutan) and south-eastern margins (north-western Yunnan, China) of the Himalayas. Taxonomic differentiation between these apparently allopatric populations of *Eupetaurus* was assessed with an integrative approach involving both morphological examinations and molecular phylogenetic analyses. Phylogenetic reconstruction was implemented using sequences of three mitochondrial [cytochrome *b* (*Cytb*), mitochondrially encoded 12S and 16S ribosomal RNA (12S, 16S)] and one nuclear [interphotoreceptor retinoid-binding protein (*IRBP*)] gene fragment. Morphological assessments involved qualitative examinations of features preserved on museum skins and skulls, supplemented with principal components analysis of craniometric data. Based on genetic and morphological comparisons, we suggest that the three widely disjunct populations of *Eupetaurus* are each sufficiently differentiated genetically and morphologically to be recognized as distinct species, two of which are described here as new.

**ADDITIONAL KEYWORDS:** Himalayan uplift – hypsodont – mammals – rodent – south-west China – South Asian river capture – taxonomy – Tibetan Plateau.

\*Corresponding author. E-mail: [jiangxl@mail.kiz.ac.cn](mailto:jiangxl@mail.kiz.ac.cn); [kris.helgen@australian.museum](mailto:kris.helgen@australian.museum)

[Version of record, published online 31 May 2021; <http://zoobank.org/urn:lsid:zoobank.org:pub:AC33BAD0-C05F-44BF-B3CB-72D674F93CE1>]

© 2021 The Linnean Society of London.

This is an Open Access article distributed under the terms of the Creative Commons Attribution License (<https://creativecommons.org/licenses/by/4.0/>), which permits unrestricted reuse, distribution, and reproduction in any medium, provided the original work is properly cited.

## INTRODUCTION

...no zoologist has dared to describe it.

Oldfield **Thomas (1888: 256)** when describing  
*Eupetaurus cinereus*.

Weighing up to 2.5 kg and with a total length up to 1100 mm, the woolly flying squirrel (*Eupetaurus cinereus* **Thomas, 1888**) is one of the largest gliding mammals (**Roberts, 1997; Zahler & Woods, 1997; Zahler, 2001**). This enigmatic species has drawn special attention from mammalogists owing to its uniquely high-crowned (hypsodont) dentition, taxonomic uniqueness, poorly known natural history and endangered conservation status (**McKenna, 1962; Zahler, 1996, 2010; Jackson & Thorington, 2012**). It was originally described by **Thomas (1888)** from two skins and a skull that came from the Astor (now Astore) and Gilgit districts in northern Pakistan. Between 1924 and 1994 it was thought to be extinct, until it was rediscovered by the scientific community in Pakistan by Peter Zahler of the Wildlife Conservation Society (**Lorimer, 1924; Zahler, 1996, 1998**). Until recently, available information indicated that *E. cinereus* was limited to several districts within northern Pakistan and north-western India in the western Himalayan region (**Pal et al., 2018, 2020**). Records of *Eupetaurus* **Thomas, 1888** outside of the western Himalayan region can be traced back as far as **Anderson (1879)**, who identified a ‘large grey squirrel’ specimen collected from Tibet (now the Xizang Autonomous Region of China), deposited in the Naturalis Museum, Leiden, The Netherlands, which is a specimen of *Eupetaurus* (see below, the holotype NML19524). Another specimen was reported from Sikkim, in north-eastern India, by **Agrawal & Chakraborty (1970)**. **Wangchuk et al. (2004)** reported *Eupetaurus* from Bhutan. Two skins, without skulls, lodged at the Kunming Institute of Zoology, Chinese Academy of Sciences, Yunnan, China (KIZ), were collected in 1973 in north-western Yunnan Province in China by staff of the KIZ (**Yang & Wang, 1989**). Most recently, camera-trap images of *Eupetaurus* were reported from Mount Gaoligong in north-western Yunnan Province, China (**Gao et al., 2017**).

Before the present study, there were only 17 known skins and four skulls of *Eupetaurus* in museums worldwide, of which 11 were collected from northern Pakistan. This study also benefitted from seven newly collected *Eupetaurus* specimens from north-western Yunnan, China. Taxonomically, *Eupetaurus* has always been considered a monotypic genus (**Jentink, 1890; McKenna, 1962; Thorington & Hoffmann, 2005; Thorington et al., 2012**), but **Yu (2002)** and **Yu et al. (2004)** found that woolly flying squirrels from

Tibet and Yunnan are deeply divergent genetically from those in the western Himalayas, probably reflecting a need to recognize more than one species in this genus. There are also clear morphological distinctions between allopatric populations of *Eupetaurus* (**Jackson & Schouten, 2012**). Therefore, the aim of this study was to undertake an integrative taxonomic review of the genus *Eupetaurus* across its distribution and make taxonomic recommendations based on interpretations of morphological and molecular data.

## MATERIAL AND METHODS

## SPECIMENS

A total of 24 specimens of *Eupetaurus* are known in natural history museums, including six specimens in the Natural History Museum, London, UK (BMNH); one in the Naturalis Museum, Leiden, The Netherlands (NML); four at the Bombay Natural History Society, Mumbai, India (BNHS); two in the Zoological Collection of the Zoological Survey of India, Kolkata, India (ZSI); two in the Florida Museum of Natural History, Gainesville, FL, USA (FLMNH); and nine in the KIZ (**Supporting Information, Supplementary Data SD1**). We have examined all of these specimens except the series at BNHS, but the only skull from the BNHS (specimen #7108, now missing according to **Zahler & Woods, 1997**) was measured and photographed by Joseph Curtis Moore (**McKenna 1962**). This allowed us to include it in our comparisons. Most available specimens were skins, and only nine skulls were available for study (two juveniles and seven adults; **Supporting Information, Supplementary Data SD1**). We also made comparisons with specimens of various other flying squirrel genera in these and other collections, including the American Museum of Natural History, New York, NY, USA (AMNH), the Field Museum of Natural History, Chicago, IL, USA (FMNH) and the National Museum of Natural History, Smithsonian Institution, Washington, DC, USA (USNM).

## MORPHOMETRIC ANALYSIS

Dental observations were made under a light microscope (Keyence digital microscope system VHX-2000C with a ×50 Kenyence VH-Z00R lens). Morphological nomenclature of the cheek teeth follows a modified version of that by **McKenna (1962)** and **Li et al. (2021)** (**Fig. 1**). Dental abbreviations in the text are D for deciduous, P for premolars, M for molars, superscript (P<sup>x</sup>, M<sup>x</sup>) for upper premolars and upper molars, and subscript (P<sub>x</sub>, M<sub>x</sub>) for lower premolars and lower molars.

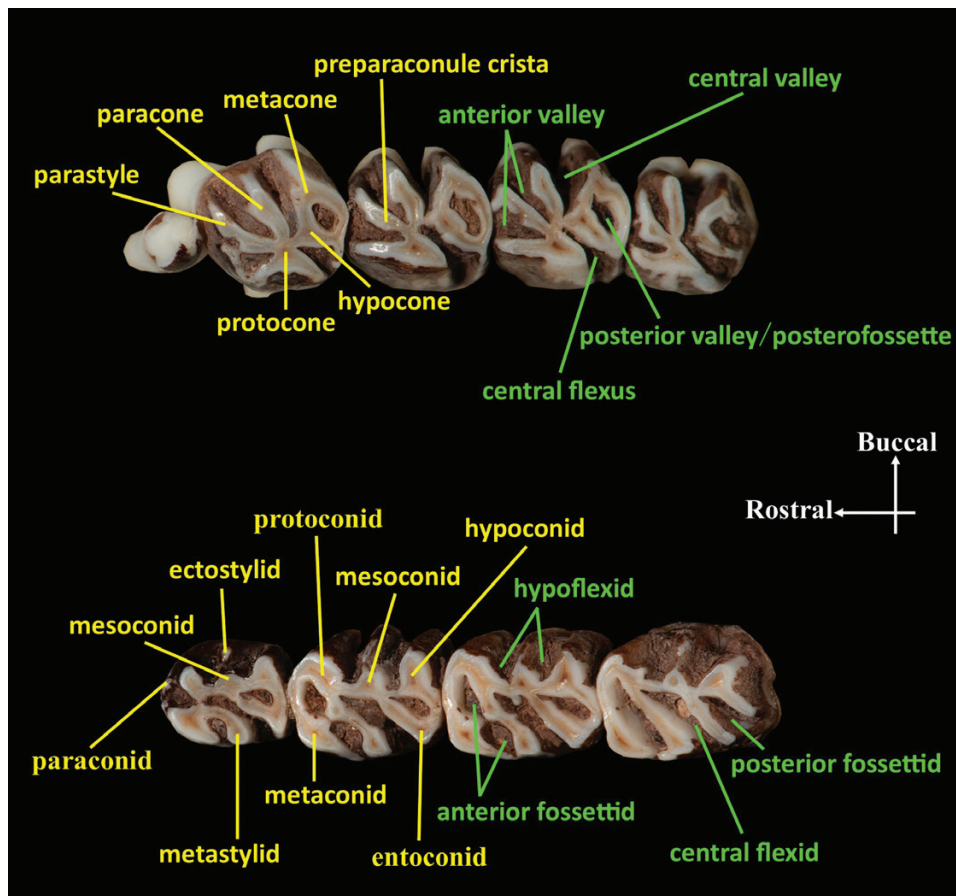

**Figure 1.** Nomenclature of the *Eupetaurus* cheek teeth: top, upper cheek teeth; bottom, lower cheek teeth.

Craniodental variables were measured with hand-held Vernier callipers (Mitutoyo 500-197; 200 mm) to the nearest 0.01 mm under a desk lamp as necessary, following a modified version of the measurements recorded by Helgen *et al.* (2009) (Fig. 2). The measurements recorded included rostral breadth (RB); width of nasals (WN); length of nasals (LN); interorbital breadth (IOB); postorbital breadth (POB); breadth of braincase (BBC); zygomatic breadth (ZB); width across infraorbital foramen (WAIF); width of incisive foramina (= anterior palatal foramina; WIF); length of incisive foramina (LIF); length of bony palate (LBP); condylobasal length (CBL); maximum skull length (MSL); length of auditory bulla (LAB); width of auditory bullae across external auditory meati (WAAM); width of palate at P<sup>3</sup> (WPP<sup>3</sup>); width of palate at P<sup>4</sup> (WPP<sup>4</sup>); width of palate at M<sup>1</sup> (WPM<sup>1</sup>); width of palate at M<sup>2</sup> (WPM<sup>2</sup>); width of palate at M<sup>3</sup> (WPM<sup>3</sup>); post-palatal length (PPL); height of braincase, measured from the basioccipital plane to the crown of the braincase (HBC); length of maxillary toothrow (P<sup>3</sup>–M<sup>3</sup>; LMTR); length of diastema (LD); width of incisors (WI); depth of incisors (DI); width of P<sup>4</sup> (WP<sup>4</sup>); width

of M<sup>1</sup> (WM<sup>1</sup>); width of M<sup>2</sup> (WM<sup>2</sup>); width of M<sup>3</sup> (WM<sup>3</sup>); length of angular process (LAP); length of condyloid process (LCP); length of dentary tooth row (LDTR); and width of lower incisor (WLI). Each variable was measured three times, and the mean was used in subsequent analysis.

A principal components analysis based on the covariance matrix was used to evaluate variation in all 34 craniodental variables taken from seven available adult skulls, which were divided into three allopatric populations (west Himalayan population, IMK 9492, FLMNH 28583 and BNHS 7108; central Himalayan population, *NML 19524*; and east Himalayan population, KIZ 034190, KIZ 035087 and KIZ 035088). However, owing to the small sample size, this was only an exploratory analysis. Missing data were filled with the mean of the population. The cheek teeth of FLMNH 28583 were worn excessively; therefore, we replaced its tooth-related measurements with the mean of the population. Raw measurements were log<sub>10</sub>-transformed to standardize variances and improve normality. All analyses were performed using PAST v.4.02 (Hammer *et al.*, 2001).



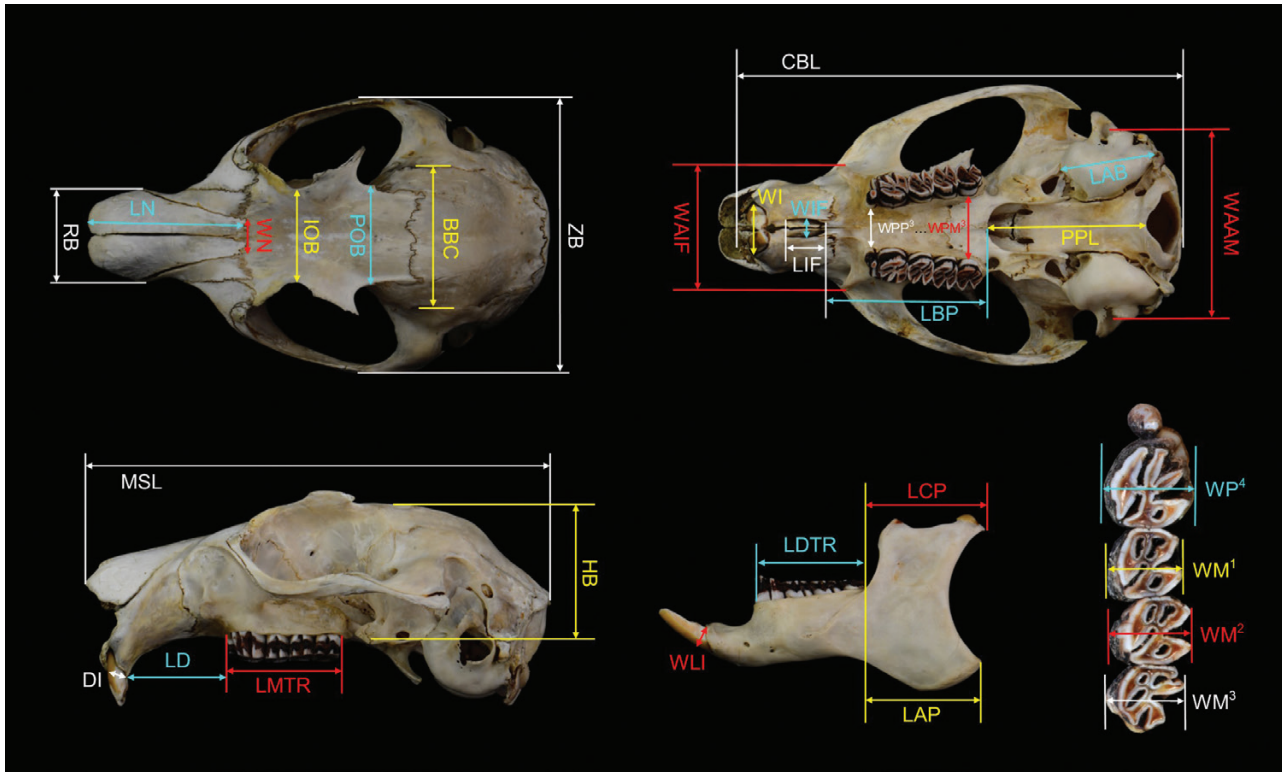

**Figure 2.** Craniodental measurements taken for this study. See main text for definitions of abbreviations. Owing to space constraints, for WPP<sup>3</sup>, WPP<sup>4</sup>, WPM<sup>1</sup>, WPM<sup>2</sup> and WPM<sup>3</sup> with similar measurement methods we show only the first and last one.

## MOLECULAR ANALYSES

### Laboratory protocols

Total genomic DNA was extracted from the muscle tissues of four newly collected Yunnan specimens (KIZ 034189–KIZ 034192) using the DNeasy Tissue kit (Qiagen). Three mitochondrial [cytochrome *b* (*Cytb*), 12S ribosomal RNA (12S) and 16S ribosomal RNA (16S)] and one nuclear [interphotoreceptor retinoid-binding protein (*IRBP*)] gene fragment that are commonly used in mammalian molecular studies (e.g. Mercer & Roth, 2003; Yu *et al.*, 2004) were selected for sequencing and analysis. All gene fragments were amplified with rtaq DNA Polymerase (Takara) [primers followed He *et al.* (2010) and Jansa *et al.* (2009) and are presented in Supporting Information, Supplementary Data SD2]. The polymerase chain reaction (PCR) products were purified with the QIAquick PCR Purification kit (Qiagen) and sequenced with the BigDye Terminator Cycle kit v.3.1 using an Applied Biosystems automated sequencer (ABI 3730xl). Sequencing reads were assembled and edited using the DNASTAR LASERGENE v.7.1.

### Phylogenetic analyses

We downloaded all previously published sequences for *Eupetaurus* (Yu, 2002; Mercer & Roth, 2003; Yu *et al.*, 2004), in addition to sequence data for various other flying squirrel taxa, from GenBank (Supporting Information, Supplementary Data SD3). We did not include the previously widely used *Aeretes* sequences [GenBank nos AY227593, AY227535 and AY227481] in our analyses, because these come from a misidentified specimen (Roth & Mercer, 2015: 223; Quan Li, pers. obs.). Squirrels from other sciurid subfamilies (Ratufinae and Sciurinae) and the mountain beaver [*Aplodontia rufa* (Rafinesque, 1817), family Aplodontiidae], which is the sister group to all squirrels (Huchon *et al.*, 2002), were selected as the outgroup taxa for phylogenetic analysis.

All gene sequences were aligned using MUSCLE (Edgar, 2004) and assessed manually in MEGA 6 (Tamura *et al.*, 2013). Pairwise *Cytb* divergences were calculated using the Kimura-2 parameter (K2P) model in MEGA 6 (Tamura *et al.*, 2013). Our phylogenetic reconstructions were based on the mitochondrial DNA (mtDNA) plus nuclear DNA



(nDNA) (12S + 16S + *Cytb* + *IRBP*) dataset and the nDNA (*IRBP*) dataset. A partitioning strategy was used to incorporate the variation in evolutionary processes among different sites (Brandley *et al.*, 2005). Appropriate models of DNA evolution for each gene fragment were compared and ranked by the Bayesian information criterion (Luo *et al.*, 2010) in jMODELTEST v.2 (Darriba *et al.*, 2012). The best substitution model for *Cytb* and 12S was GTR+G, and the best model for 16S and *IRBP* was SYM+G. Maximum-likelihood (ML) analyses and Bayesian inference (BI) were performed using RAXML v.7.3.2 (Stamatakis *et al.*, 2008) and BEAST v.1.7.5 (Drummond *et al.*, 2012), respectively.

In ML analysis, the GTRGAMMA model was selected for each partition, and the rapid bootstrapping algorithm was set for running 500 replicates. In BI analysis, we used the relaxed uncorrelated lognormal clock models that allowed the rate in each branch to evolve independently. The BEAST analyses were repeated four times, each analysis for 50 million generations, with a sampling interval of 5000. TRACER v.1.6 was used to confirm the effective sample sizes (ESSs) > 200, and the first 25% of the generations were treated as burn-in. Both ML and BI analyses were performed using resources available in the CIPRES Science Gateway (Miller *et al.*, 2010).

#### Molecular dating and species delimitations

Divergence times were estimated using BEAST v.1.7.5 (Drummond *et al.*, 2012). The mtDNA + nDNA (12S + 16S + *Cytb* + *IRBP*) dataset was used for molecular dating analyses to avoid overestimation of divergence times. The oldest fossil squirrel, *Douglassciurus jeffersoni* (E. Douglass, 1902), dated to the late Eocene (~37.2–33.9 Mya), was used for calibration (Emry & Thorington, 1984; Goodwin, 2008). We used an exponential distribution for the prior of this calibration and set the lower boundary to 33.9 Mya. All other settings for the analysis were the same as those described for the previous phylogenetic reconstructions.

The single-threshold generalized mixed Yule coalescent (GMYC) model (Pons *et al.*, 2006) was applied to delimit species boundaries and determine the number of putative species. Maximum-likelihood statistics and divergence times were used to estimate the split point from the species to the population level (using the R package ‘splits’). We conducted this analysis based on the *Cytb* time-calibrated tree because the availability of *Cytb* sequences for all major geographical regions of occurrence for *Eupetaurus* (from Pakistan, Tibet and Yunnan) best facilitated our examinations of species delimitation in the genus. The Bayesian analysis was based on the Poisson Tree Process model (bPTP, <http://species.h-its.org/ptp/>; Zhang *et al.*, 2013) with the

ML tree derived from the *Cytb* gene. In addition, the Bayesian species delimitation was evaluated further using BP&P v.3.1 (Yang & Rannala, 2010, 2014), analysed with both A10 and A11 models.

## RESULTS

### MORPHOLOGICAL COMPARISON

A principal components analysis was used to evaluate morphological variation in 34 craniodental variables among the three allopatric populations of *Eupetaurus*. The first component (PC1) separated individuals mainly on the basis of WIF, WM<sup>1</sup>, WM<sup>2</sup>, WLI, WM<sup>3</sup> and LAP (63.18% of variation), the second component (PC2) on the basis of WPP<sup>3</sup>, IOB, LCP, WN, WP<sup>4</sup> and WIF (16.76% of variation) and the third (PC3) on the basis of WPM<sup>1</sup>, WPP<sup>3</sup> and WPP<sup>4</sup> (8.51% of variation; Supporting Information, Supplementary Data SD4). The bivariate scatter plot of specimen scores on PC1 and PC2 clearly distinguished the three allopatric populations from each other (Fig. 3).

External body measurements and masses for each species from the available literature and specimens is found in Table 1. Measurements of variables for all nine available skulls is found in Table 2. Some easily observed distinguishing features of the three species of *Eupetaurus* are summarized in Table 3.

### MOLECULAR COMPARISON

Phylogenetic reconstructions generated a similar tree topology with both the mtDNA + nDNA dataset and the nDNA dataset (Fig. 4; Supporting Information, Supplementary Data SD5). In all trees, all *Eupetaurus* samples formed a clade with strong support [i.e. Bayesian posterior probability (PP) ≥ 0.95 and ML bootstrap proportions (BP) ≥ 75]. Within the *Eupetaurus* clade, the samples from Yunnan and Tibet formed a well-supported and independent clade compared with *E. cinereus* from Pakistan (PP = 1.0 and BP = 100; Fig. 4).

Intergeneric relationships of *Eupetaurus* were not recovered consistently in different trees (Fig. 4). In the nDNA tree (Supporting Information, Supplementary Data SD5) and the ML tree of the mtDNA + nDNA dataset (Fig. 4A), *Aeromys* + *Biswamoyopterus* was recovered as the sister clade of *Eupetaurus*, whereas in the BI tree of mtDNA + nDNA dataset (Fig. 4B), *Eupetaurus* showed a sister relationship with a clade comprising *Biswamoyopterus* + *Aeromys* + *Pteromyscus* + *Belomys* + *Trogopterus* + *Pteromys*.

The most recent common ancestor of squirrels can be dated to ~35 Mya. The divergence time between *Eupetaurus* and other flying squirrels is likely to have occurred in the early to mid-Miocene [16.86 Mya; 95%

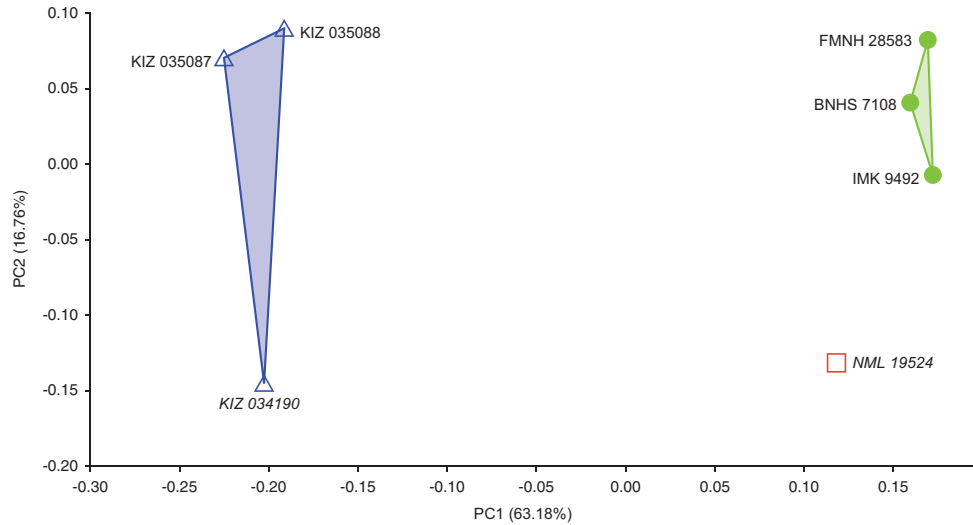

**Figure 3.** Principal components analysis scatter plot of the skulls of *Eupetaurus*. Key: circles, specimens from Pakistan (*Eupetaurus cinereus*); square, specimen from Tibet (*Eupetaurus tibetensis*); triangles, specimens from Yunnan (*Eupetaurus nivamons*). Abbreviation: PC, principal component.

**Table 1.** Measurements of external variables recorded from *Eupetaurus*. Measurements of *Eupetaurus cinereus* were taken from Roberts (1997) and Zahler and Woods (1997).

| External variables           | <i>Eupetaurus cinereus</i> | <i>Eupetaurus tibetensis</i> | <i>Eupetaurus nivamons</i> |
|------------------------------|----------------------------|------------------------------|----------------------------|
| Length of head and body (mm) | 420–610                    | 468                          | 410–445                    |
| Length of tail (mm)          | 380–545                    | 350+                         | 405–440                    |
| Length of ears (mm)          | 27–49                      | Unknown                      | 44.5–50                    |
| Length of hindfeet (mm)      | 83–93                      | Unknown                      | 86–95                      |
| Body mass (g)                | 1420–2500                  | Unknown                      | 1420–1903                  |

confidence interval (CI) = 13.72–20.46 Mya]. Typical *E. cinereus* from Pakistan probably split from *Eupetaurus* from Yunnan and Tibet by the late Miocene (10.19 Mya; 95% CI = 6.89–13.83 Mya). *Eupetaurus* from Tibet and Yunnan probably split from each other by the Pliocene–Pleistocene boundary (4.46 Mya; 95% CI = 2.28–6.98 Mya).

#### Molecular divergence within *Eupetaurus*

Specimens from the three major geographical areas of occurrence for *Eupetaurus* (Pakistan, Tibet and Yunnan) all showed deep respective genetic divergences, grouping into two major clades, east and west. Divergences for *Cytb* measured 14–20% (K2P distance) between specimens from Pakistan and specimens from farther east (Tibet and Yunnan). Divergences for *Cytb* measured 4–5% (K2P distance) between the sample from Tibet and those from Yunnan. These are genetic divergences consistent with or greater than species-level distinctions in many other groups of mammals (Baker & Bradley, 2006), including other squirrel genera (e.g. Harrison *et al.*, 2003; Baker & Bradley,

2006; Helgen *et al.*, 2009). Genetic divergence within *Eupetaurus* samples from Yunnan was considerably smaller, consistent with intraspecific differences (K2P distance = 1.2%). Likewise, minimal genetic difference was observed within samples from Pakistan.

#### Molecular species delimitation

*Cytb* tree-based analyses using the single-threshold GMYC model recognized three putative species diverging > 0.51 Mya, indicating that all three regional groupings of *Eupetaurus* (from Pakistan, Tibet and Yunnan) might be recognized taxonomically at the species level (Fig. 5). This was confirmed in our bPTP analysis with strong Bayesian support (PP = 0.814, 0.947 and 0.942, respectively). This level of divergence-time depth is consistent with that between species of squirrels in various other genera (e.g. Hawkins *et al.*, 2016a, b). Furthermore, the delimitation using BP&P has supported the new taxa (PP = 0.99 in A10 model and PP = 0.95 in A11 model; Supporting Information, Supplementary Data SD6).

**Table 2.** Measurements of skull variables recorded from *Eupetaurus*

| Skull variables  | ZSI 9492 | FLMNH 28583 | BNHS 7108* | NML19524    | KIZ 034190  | KIZ 034192 | KIZ 034189 | KIZ 035087 | KIZ 035088 |
|------------------|----------|-------------|------------|-------------|-------------|------------|------------|------------|------------|
| Age              | Adult    | Old         | Adult      | Young adult | Young adult | Juvenile   | Juvenile   | Adult      | Adult      |
| RB               | 13.37    | 13.66       | 16         | 13.36       | 14.01       | 13.57      | 12.35      | 16.24      | 15.86      |
| WN               | 7.74     | 7.74        | 7.7        | 6.16        | 6.29        | 5.83       | 5.94       | 7.09       | 6.38       |
| LN               | 29.02    | 26.11       | 27.5       | 24.54       | 27.13       | 25.05      | 23.64      | 26.85      | 28.77      |
| IOB              | 19.95    | 19.95       | 19         | 15.78       | 14.90       | 14.67      | 14.08      | 17.87      | 15.19      |
| POB              | 15.02    | 16.00       | 16.6       | 16.43       | 16.27       | 16.34      | 15.96      | 16.42      | 16.38      |
| BBC              | 22.54    | 21.22       | –          | 22.31       | 22.34       | 18.61      | 19.72      | 21.74      | 20.21      |
| ZB               | 45.73    | 47.17       | 46.5       | 44.43       | 45.22       | 41.73      | 40.09      | 46.27      | 47.03      |
| WAIF             | 19.38    | 18.33       | 18.5       | 17.90       | 19.93       | 17.87      | 17.58      | 22.57      | 22.57      |
| WIF              | 4.86     | 4.42        | –          | 4.72        | 3.16        | 2.70       | 2.93       | 2.60       | 2.77       |
| LIF              | 7.88     | 7.19        | –          | 6.40        | 8.46        | 5.56       | 5.61       | 6.75       | 6.41       |
| LBP              | 26.72    | 27.35       | –          | 25.56       | 26.07       | 24.82      | 24.14      | 28.00      | 27.26      |
| CBL              | Broken   | 73.63       | 72.5       | 68.52       | 71.92       | 65.76      | 65.66      | 71.77      | 73.48      |
| MSL              | Broken   | 76.45       | 77.5       | –           | 75.30       | 70.60      | 69.14      | 77.30      | 77.87      |
| LAB              | Broken   | 14.73       | 15         | 13.40       | 14.79       | 14.31      | 15.25      | 15.72      | 16.07      |
| WAAM             | Broken   | 25.82       | –          | 24.79       | 29.90       | 29.14      | 27.19      | 31.24      | 30.47      |
| WPP <sup>3</sup> | 5.92     | 7.65        | –          | 6.39        | 6.08        | 8.40       | 7.89       | 7.76       | 7.19       |
| WPP <sup>4</sup> | 6.65     | 7.65        | –          | 7.44        | 6.86        | 7.51       | 7.43       | 6.66       | 5.71       |
| WPM <sup>1</sup> | 8.46     | 11.47       | –          | 8.90        | 8.19        | 8.82       | 8.23       | 8.85       | 8.37       |
| WPM <sup>2</sup> | 9.78     | 11.48       | –          | 10.89       | 9.44        | 9.49       | 9.10       | 9.96       | 9.60       |
| WPM <sup>3</sup> | 11.47    | 12.33       | –          | 12.39       | 10.49       | 9.85       | 9.68       | 10.88      | 10.22      |
| PPL              | Broken   | Broken      | –          | 23.28       | 25.60       | 23.33      | 22.74      | 26.10      | 27.52      |
| HBC              | 23.40    | 24.37       | –          | 23.29       | 23.30       | 22.34      | 20.40      | 22.09      | 22.54      |
| LMTR             | 21.59    | 17.25       | 21         | 19.79       | 18.61       | 18.55      | 18.50      | 20.09      | 20.76      |
| LD               | 16.99    | 18.77       | 15.5       | 15.22       | 16.91       | 15.15      | 14.13      | 16.57      | 16.60      |
| WI               | 7.70     | 8.42        | –          | 7.66        | 6.68        | 4.70       | 5.30       | 6.29       | 7.24       |
| DI               | 3.08     | 2.80        | –          | 2.57        | 2.97        | 2.52       | 3.15       | 2.84       | 2.80       |
| WP <sup>4</sup>  | 5.98     | 5.16        | –          | 5.20        | 4.66        | 4.48       | 4.15       | 5.02       | 5.54       |
| WM <sup>1</sup>  | 5.41     | 3.34        | –          | 5.07        | 3.97        | 3.99       | 3.92       | 4.13       | 4.53       |
| WM <sup>2</sup>  | 5.52     | 4.60        | –          | 5.09        | 3.88        | 4.05       | 4.22       | 4.42       | 4.79       |
| WM <sup>3</sup>  | 4.93     | 4.24        | –          | 4.53        | 3.71        | 3.62       | 3.68       | 4.00       | 4.41       |
| LAP              | 15.57    | 16.88       | –          | 15.19       | 19.24       | 14.65      | 18.84      | 18.85      | 20.51      |
| LCP              | 19.79    | 19.10       | –          | 17.88       | 16.81       | 17.41      | 17.18      | 19.44      | 21.03      |
| LDTR             | 21.12    | 17.82       | 21         | 19.65       | 19.50       | 18.84      | 18.97      | 21.06      | 21.61      |
| WLI              | 3.30     | 3.02        | –          | 3.11        | 2.57        | 2.28       | 2.29       | 2.46       | 2.73       |

The abbreviations of skull measurements are defined in the main text and illustrated in [Figure 2](#).

\*Data from [McKenna \(1962\)](#), measured by Joseph Curtis Moore.

## SYSTEMATICS

ORDER RODENTIA BOWDICH, 1821

SUBORDER SCIUROMORPHA BRANDT, 1855

FAMILY SCIURIDAE FISCHER, 1814

SUBFAMILY SCIURINAE FISCHER, 1814

TRIBE PTEROMYINI BRANDT, 1855

GENUS *EUPETAURUS* THOMAS, 1888

*Eupetaurus* are amongst the largest flying squirrels, with fur that is thick, long and soft. Dorsal coloration

ranges from pale grey to brownish grey, and ventral coloration is typically whitish grey. The cylindrical, fox-like tail is long and bushy. The palmar and plantar surfaces are thickly furred between naked pads ([Fig. 6](#)).

The skull is generally similar to other flying squirrels (reviewed in detail by [McKenna, 1962](#)), with the following diagnostic features ([Fig. 7](#)): (1) the snout is long and constricted at the base; (2) the incisors are ungrooved and relatively small, with pale yellow enamel faces; (3) the glenoid fossa opens posteriorly, with the opening placed high on the skull; (4) the coronoid process of the mandible is weak, not rising



**Table 3.** Easily observed diagnostic features of the three species of *Eupetaurus*

| Character                  | <i>Eupetaurus cinereus</i>           | <i>Eupetaurus tibetensis</i>          | <i>Eupetaurus nivamons</i>      |
|----------------------------|--------------------------------------|---------------------------------------|---------------------------------|
| Dorsal fur colour          | More grey; extensive grey frosting   | More brown                            | More brown                      |
| Tail tip colour            | Shorter black tail tip, ~5–10% black | Shorter black tail tip, ~10–15% black | Long black tail tip, ~50% black |
| Rostral breadth            | Narrow (13.4–13.7 mm)                | Narrow (13.4 mm)                      | Wide (14–16.2 mm)               |
| Interorbital breadth       | Wide (19–20 mm)                      | Narrow (15.8 mm)                      | Narrow (14.9–17.9 mm)           |
| Temporal ridge             | Posteriorly convergent               | Posteriorly convergent                | Parallel                        |
| Shape of upper cheek teeth | Heart shaped                         | Heart shaped                          | Round                           |
| Shape of lower cheek teeth | Subsquare                            | Subrectangular                        | Subrectangular                  |
| Anterior fossettid         | A short one                          | A long one                            | Two short ones                  |

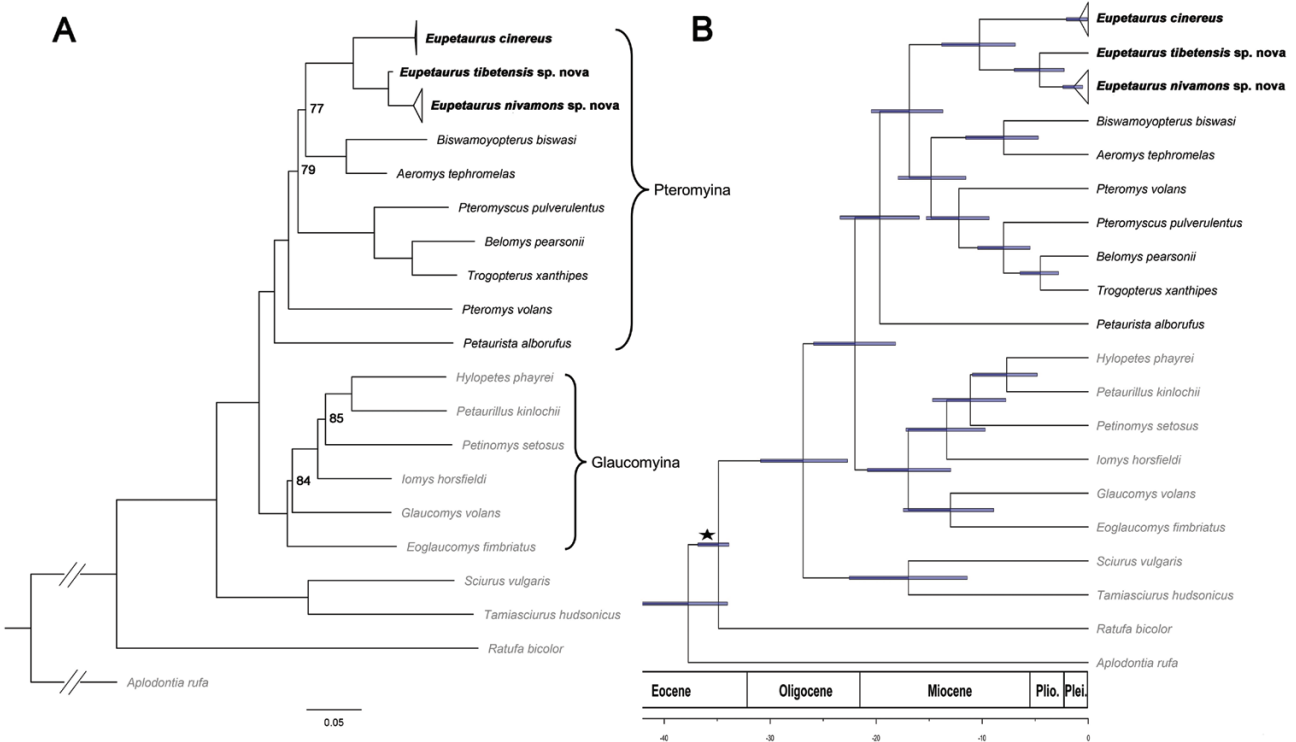

**Figure 4.** Phylogenetic trees showing the position of the three *Eupetaurus* taxa using combined mitochondrial and nuclear DNA. A, maximum-likelihood tree. B, Bayesian inference tree. We mark only the maximum-likelihood bootstrap proportions < 90 and Bayesian posterior probabilities < 0.9. The star indicates the fossil occurrence used in this study.

above the condyle; (5) the cheek teeth are large, slow to erupt and strongly hypsodont in younger animals (the occlusal surfaces becoming nearly flat after wear); they are enormously expanded vertically (Supporting Information, Supplementary Data SD7), with cusps and their interconnecting ridges combined into lophs and cross-lophs (this remarkable hypsodonty is unlike any other sciurid); (6) the alveolar cavities are strongly swollen to house the unerupted portion of the hypsodont cheek teeth; and (7) ‘the pterygoid fossae possess three diagonally elongate pits for the origin of powerful pterygoid musculature’ (McKenna,

1962). These diagnostic features appear to relate to *Eupetaurus* feeding primarily on abrasive food, with the incisors reduced in functionality and chewing achieved mainly by anteroposterior trituration of the cheek teeth (McKenna, 1962). Limited available natural history information (mainly for *E. cinereus*) suggests that these squirrels might specialize on eating pine needles (Zahler & Khan, 2003).

The upper cheek-tooth row is strongly convergent anteriorly in adults (although it remains more parallel in juveniles). The P<sup>3</sup> is peg-like and strong. The relative size of the upper cheek teeth can be

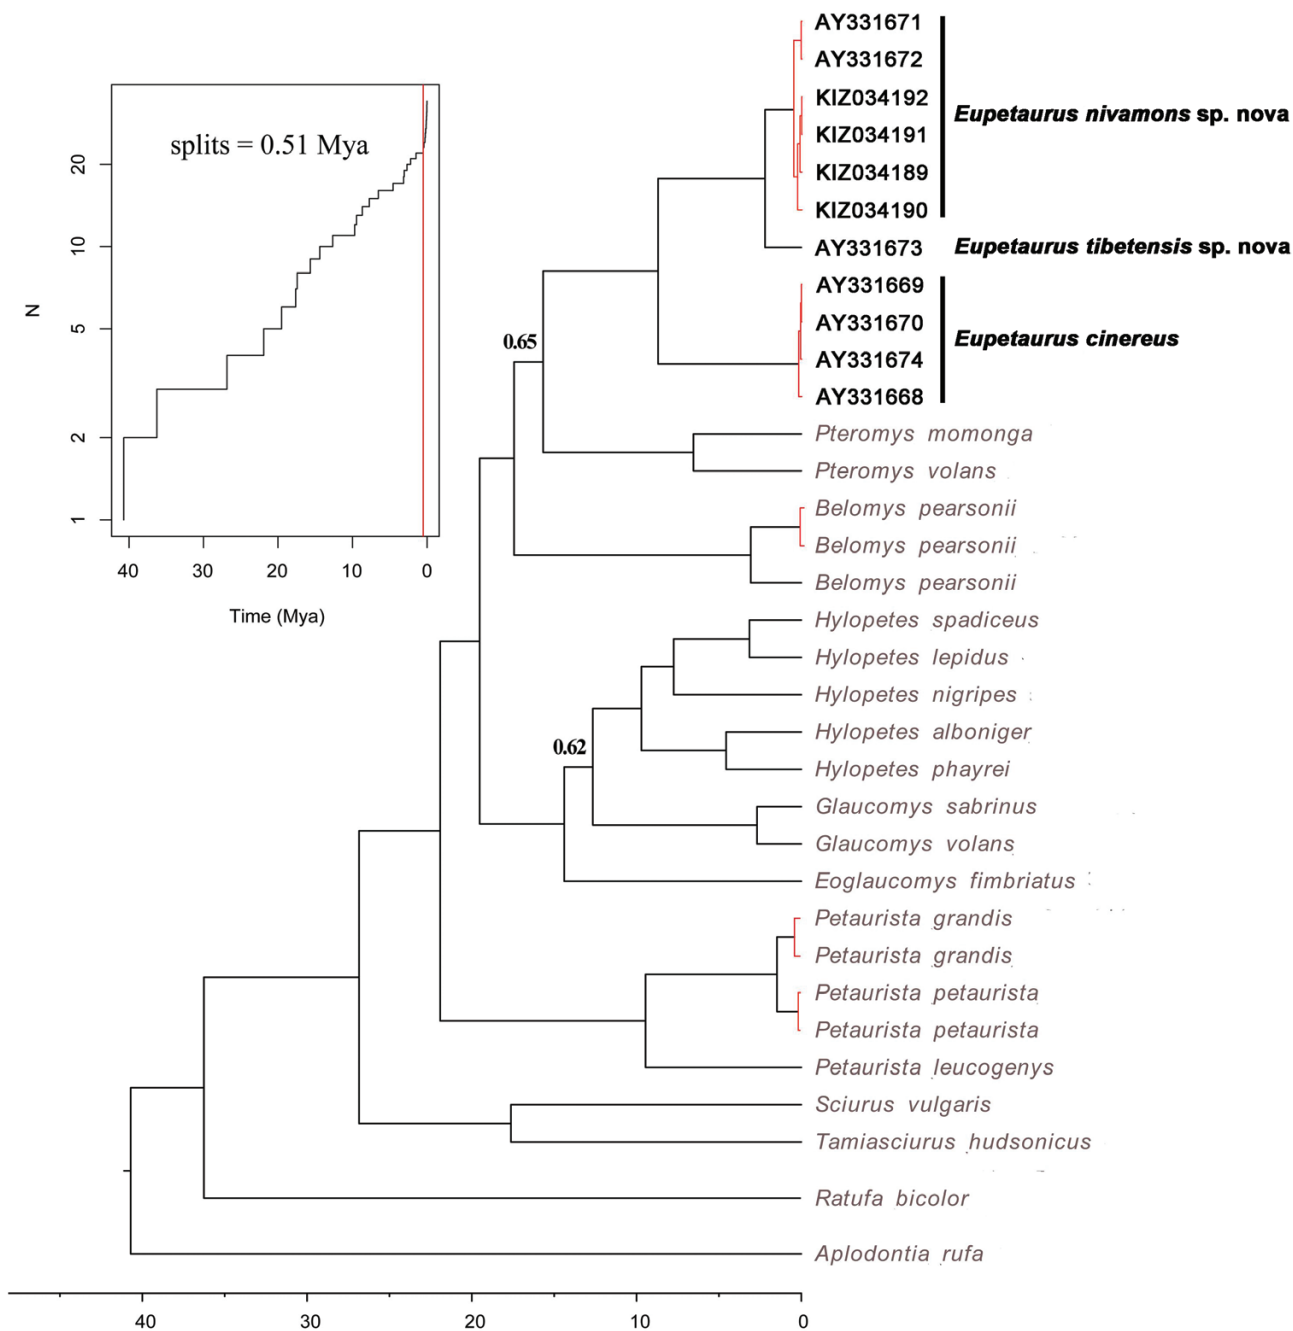

**Figure 5.** Molecular species delimitation based on generalized mixed Yule coalescent model and *Cytb* data for the three taxa of *Eupetaurus*. Red lines represent intraspecific variation; black lines represent variation above species level.

given as  $P^4 > M^1 \approx M^2 > M^3$ . The  $P^4$  (and  $DP^4$ ) and the upper molars have similar structures: the endoloph is strongly folded to form the 'posterolingual diagonal flexus' (see below); the anteroloph, hypertrophic preparaconule crista, paraloph, metaloph and posteroloph are finger-like and connected, in turn, to the buccal side of the endoloph. The anterior valley is wide and divided by the preparaconule crista. When

worn, the preparaconule crista gradually connects with the parastyle to isolate the lingual part of anterior valley into an anterofossette. The central valley is always open. The posterior valley is always closed into a posterofossette, except in the  $M^3$  in early wear.

The relative size of the lower cheek teeth can be given as  $P_4 > M_1 \approx M_2 \geq M_3$ . The structure of the lower

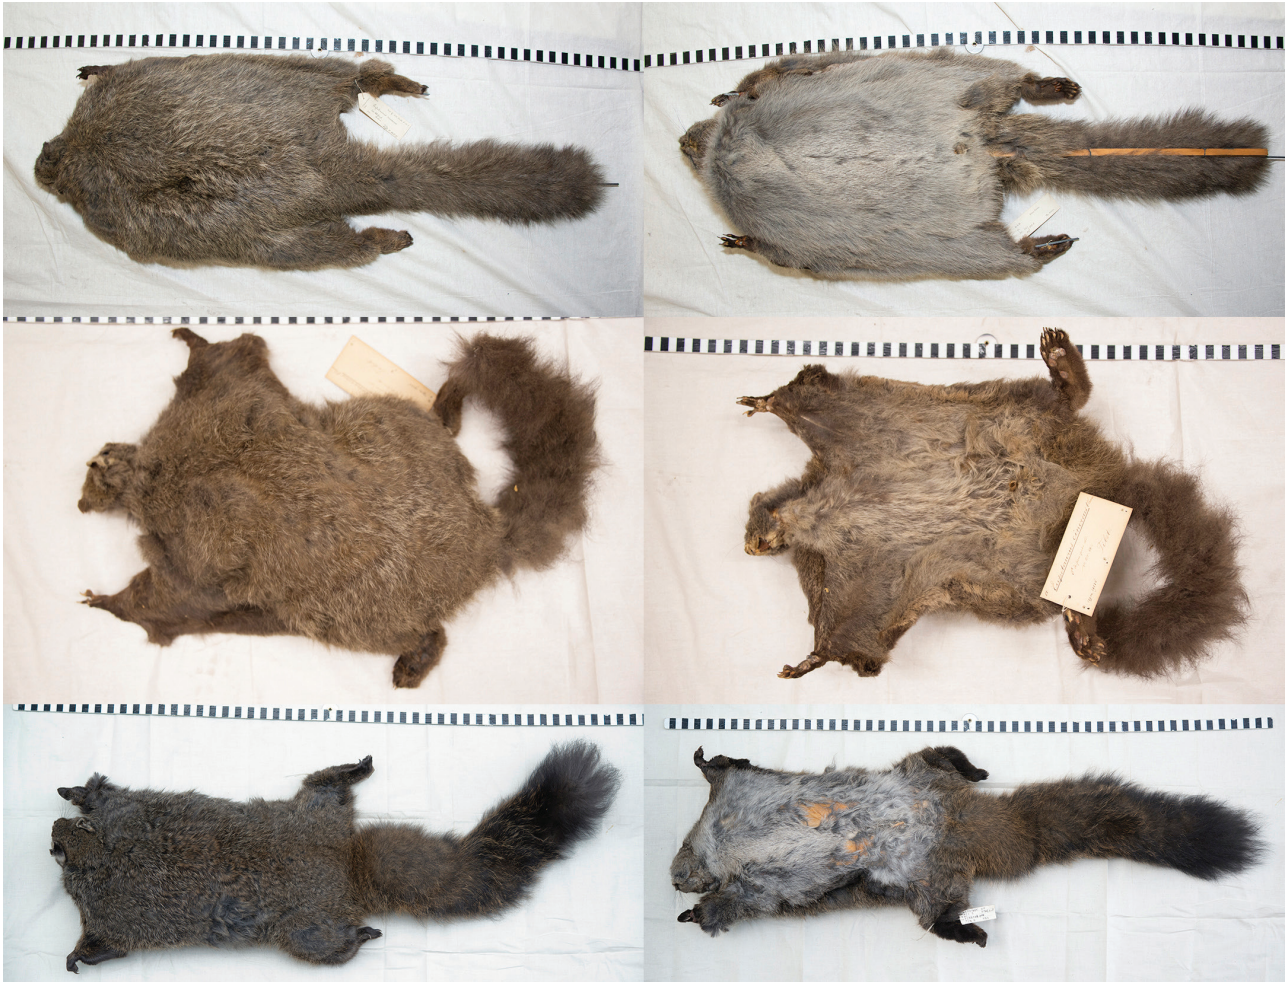

**Figure 6.** Skins of the three taxa of *Eupetaurus*. Top row, specimen from Pakistan (*Eupetaurus cinereus* BMNH 14. 2. 10. 1); middle row, Tibet (*Eupetaurus tibetensis* NML 19524, holotype); bottom row, Yunnan (*Eupetaurus nivamons* KIZ 034190, holotype).

molars is relatively simple, with a ‘ring’ at the front and back, connected by the ectolophid in the middle. The anterior ring is formed by the anterolophid between the protoconid and metaconid, and the protolophid between the protoconid and metastylid. The centre of the anterior ring is one (*E. cinereus* and *E. tibetensis*) or two (*E. nivamons*) anterior fossettids. The lingual edge of the anterior fossettid is not closed in early wear. The posterior ring is formed by the entolophid and posterolophid that run between hypoconid and entoconid. The centre of the posterior ring is one posterior fossettid (talonid basin remnant). The posterior fossettid of  $M_3$  is not closed in early wear. The mesoconid develops into a buccal cusp as strong as the protoconid and hypoconid on the middle of the ectolophid, which divides the hypoflexid into two folds. The central flexid runs from the posterolingual side of the tooth to the base of the anterior fold of the

hypoflexid. Generally,  $DP_4$  is similar to the lower molars, but has two opened anterior fossettids and two extra small cusps: an isolated paraconid in front of the buccal anterior fossettid and an isolated ectostylid on the buccal side of the mesoconid (Fig. 8). Also,  $P_4$  possess two open anterior fossettids and an isolated paraconid, but the paraconid will connect with the metaconid and protoconid as the teeth are worn. The mesoconid is very small on  $P_4$  in *Eupetaurus* (Fig. 9F). The entire crown of  $P_4$  is more diagonally oriented than  $DP_4$  and lower molars.

#### *EUPETAURUS CINEREUS* THOMAS, 1888

*Suggested common name:* Western woolly flying squirrel.

*Lectotype:* BMNH 88.9.28.1, adult, skin, ‘Astor District’ (= Astore, Pakistan).



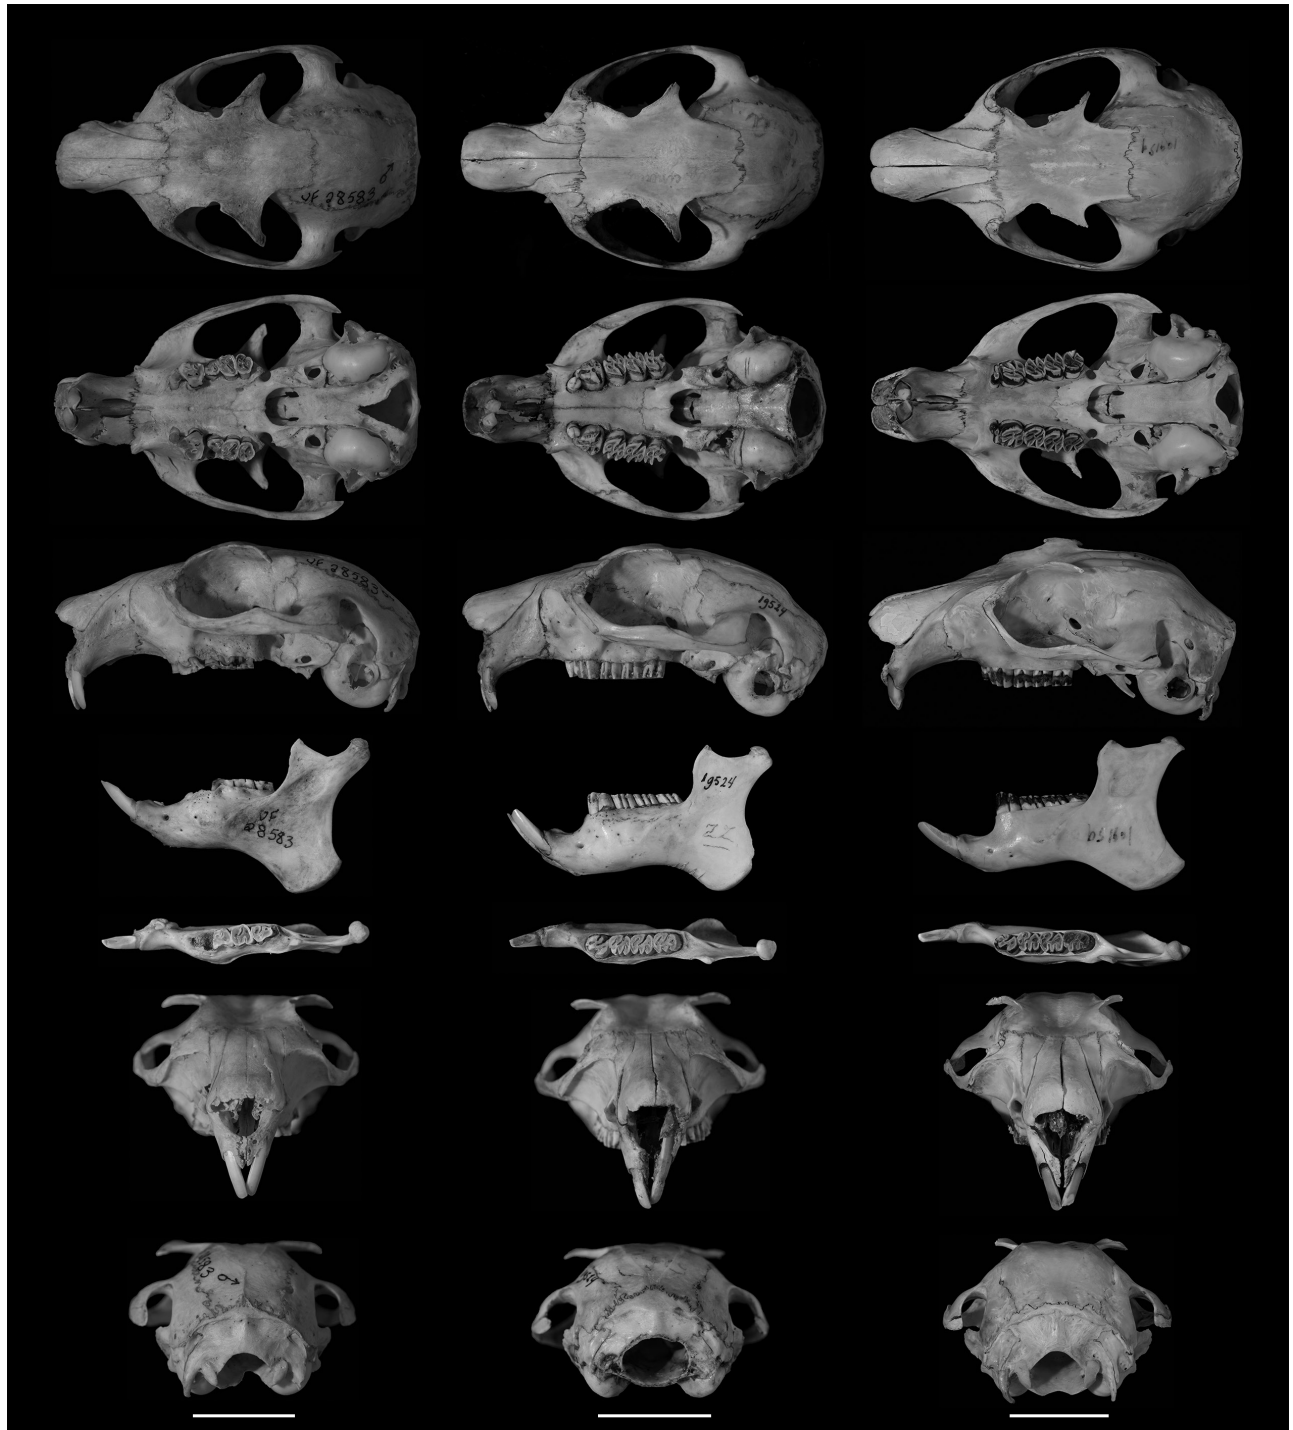

**Figure 7.** Skulls of *Eupetaurus*, from left to right: *E. cinereus* (FLMNH 28583) from Pakistan; *E. tibetensis* NML 19524, holotype, from Tibet; and *E. nivamons* KIZ 034190, holotype, from Yunnan. Scale bars (under each skull series): 2 cm.

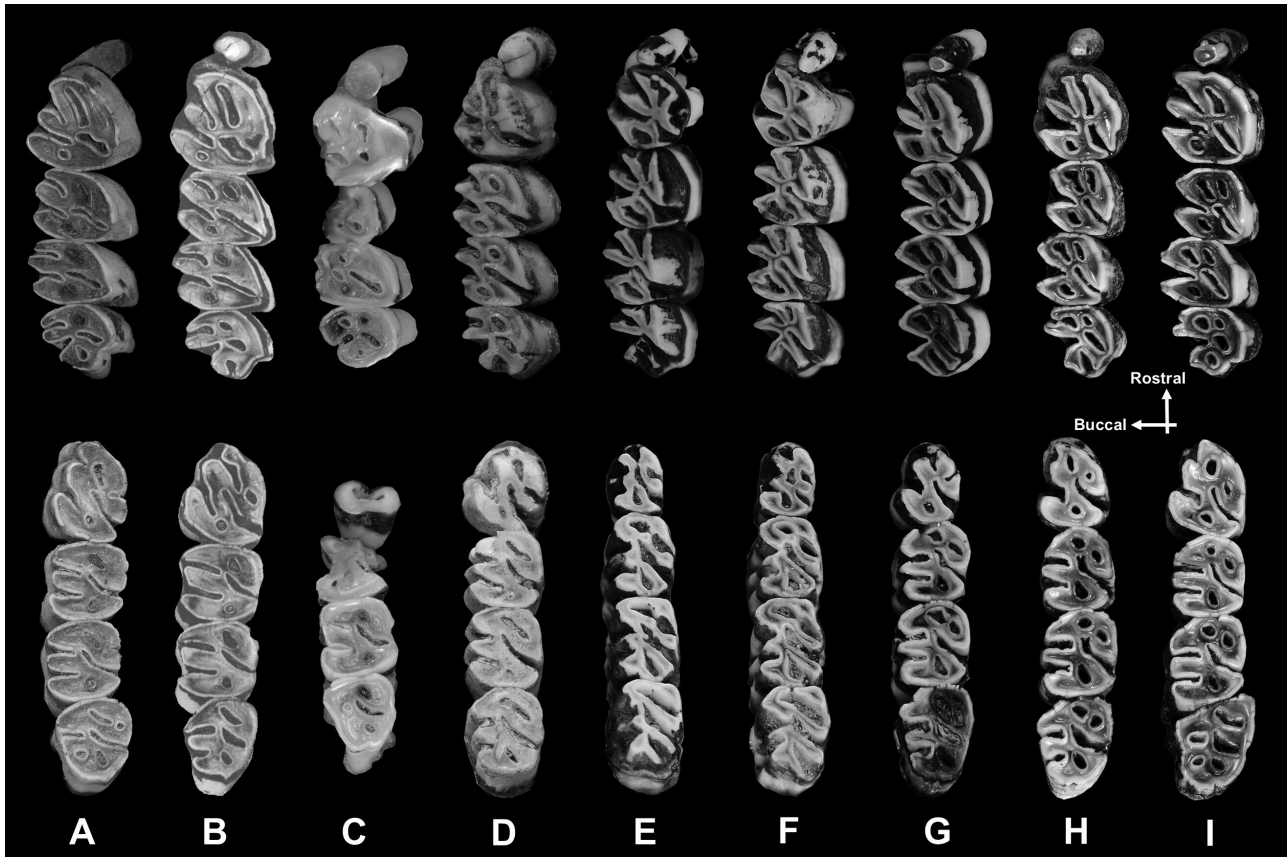

**Figure 8.** Cheek teeth of the nine known skulls of *Eupetaurus* species: A, *Eupetaurus cinereus* ZSI 9492, adult from Pakistan; B, *E. cinereus* BNHS 7108, adult (now reported lost) from Pakistan (McKenna 1962); C, *E. cinereus* FLMNH 28583, old adult, from Pakistan; D, *Eupetaurus tibetensis* NML 19524, holotype, young adult, from Tibet; E, *Eupetaurus nivamons* KIZ 034189, immature, from Yunnan; F, *E. nivamons* KIZ 034192, immature, from Yunnan; G, *E. nivamons* KIZ 034190, holotype, young adult, from Yunnan; H, *E. nivamons* KIZ 035087, adult, from Yunnan; and I, *E. nivamons* KIZ 035088, adult, from Yunnan. Left side is labial side.

*Type locality:* ‘Astor District, Kashmir’ (= Astore District, Pakistan).

*Diagnosis:* *Eupetaurus cinereus* differs from other *Eupetaurus* species in its overall more grizzled-grey pelage, with more pronounced grey frosting to the dorsal hairs (more saturated brown tones in the pelage of other species). Interspecific distinctions in the skull mainly concern the breadth of the rostrum and the shape of the frontal bones: the rostrum of *E. cinereus* is similar to that of *E. tibetensis* and narrower than that of *E. nivamons*; the interorbital region of *E. cinereus* is broader than in the other two species, and its postorbital processes is larger; the temporal ridges of *E. cinereus* and *E. tibetensis* are convergent posteriorly rather than parallel in *E. nivamons* (Table 3). The cusps and ridges of cheek teeth of *E. cinereus* are markedly more robust than in the other two species. The developed protocone and hypocone make the upper cheek teeth heart shaped,

similar to *E. tibetensis*, and differ from the round ones in *E. nivamons*. Its lower molars are subsquare, also more robust than the subrectangular ones in the other two species. *Eupetaurus cinereus* preserves only one short anterior fossettid (one long anterior fossettid in *E. tibetensis*; two short anterior fossettids in *E. nivamons*) (Figs 7, 8).

*Descriptive notes:* Size large: head-body length 420–510 mm, tail length 430–545 mm, hind foot length 83–93 mm and mass 2500 g (Zahler & Woods, 1997). The dorsal pelage is typically grizzled greyish, although a melanistic example was recorded by Chakraborty & Agrawal (1977) from Chitral, Pakistan. The pointed ears are hairy, with the outer fur black or brown and the fur of the inner ear greyish. The dorsal surface of the patagium is darker brown. The dorsal surfaces of the forefeet are black and those of the hindfeet are brown. The ventral



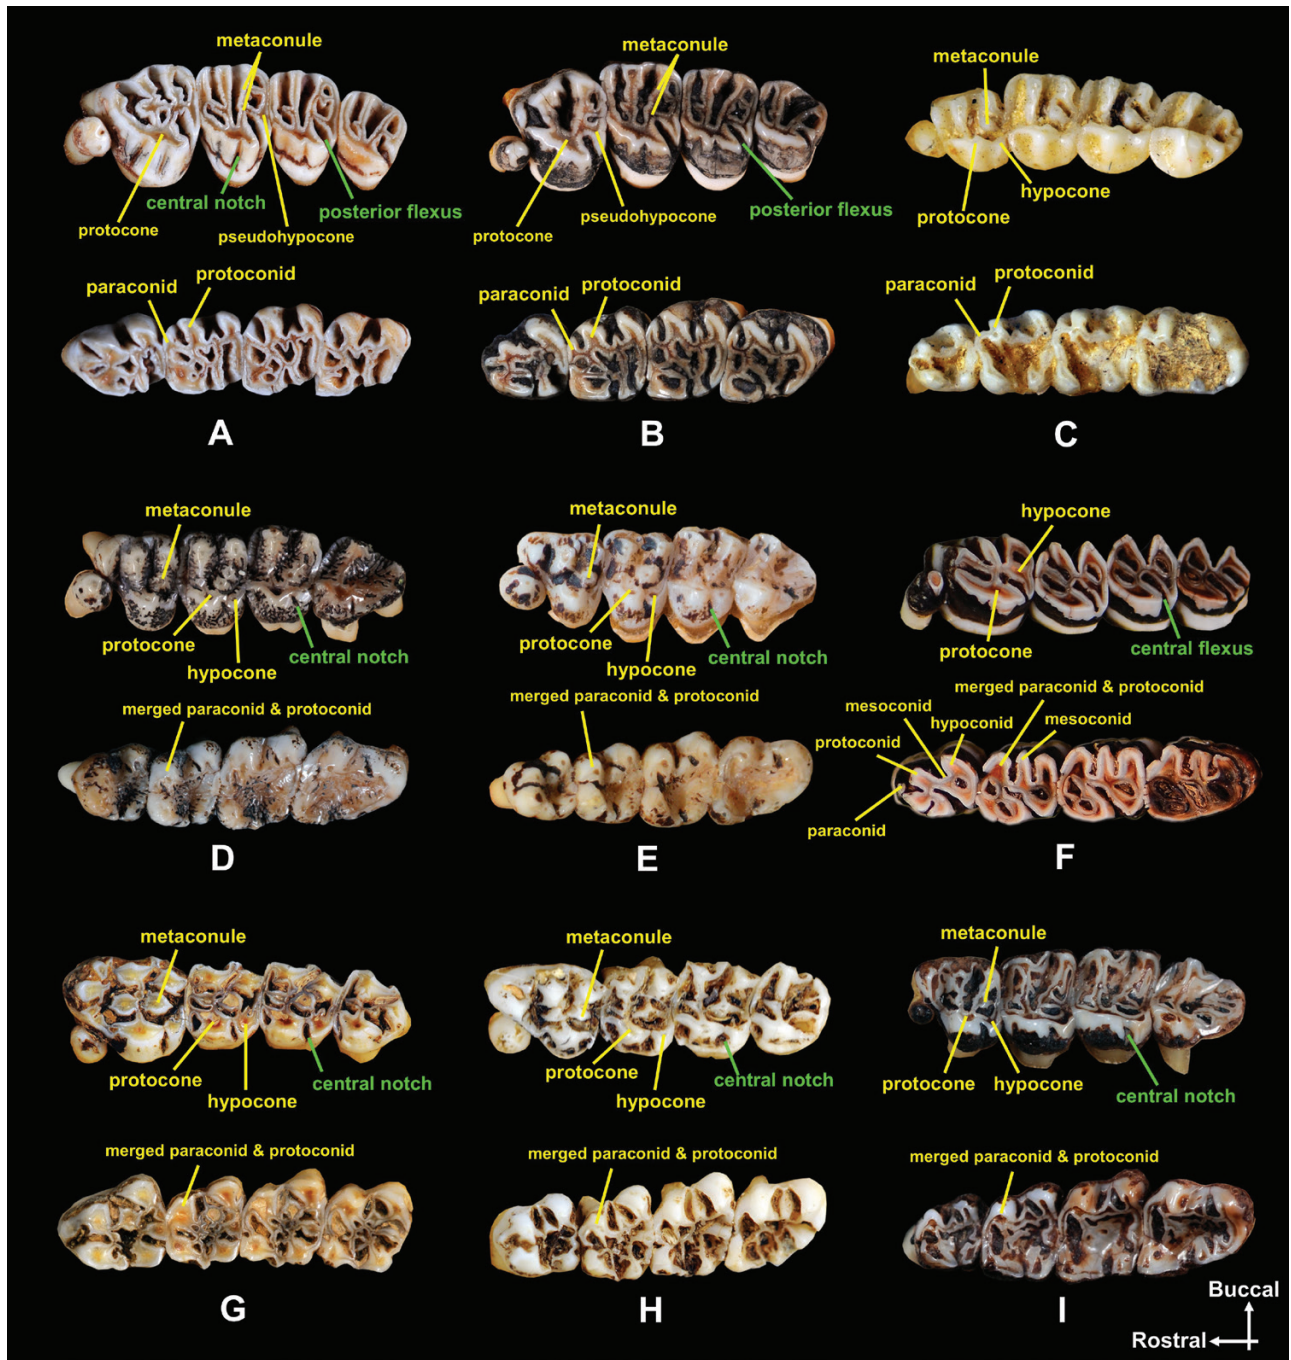

**Figure 9.** Comparison of cheek teeth between *Eupetaurus* and related genera: A, *Petaurista xanthotis* (USNM 144021); B, *Aeretes melanopterus* (USNM 219205); C, *Pteromys volans* (AMNH 19534); D, *Aeromys tephromelas* (USNM 292649); E, *Biswamoyopterus biswasi* (ZSI 20705); F, *Eupetaurus nivamons* (KIZ 034190); G, *Trogopterus xanthipes* (FMNH 39835); H, *Belomys pearsonii* (FMNH 35443); and I, *Pteromyscus pulverulentus* (USNM 481186).

pelage is pale brownish grey, with the hairs slate coloured basally and dirty white terminally. The tail is long, cylindrical and exceedingly bushy, with similar coloration to the body, often with the portion of the black tail tip short. The skull and dentition

are as described above for the genus *Eupetaurus* and diagnosis of the species.

*Distribution:* Until recently, *E. cinereus* was known only by specimens and sightings from a few localities



between 2400 and 3600 m a.s.l. in the western Himalayan region, concentrated around Gilgit in northern Pakistan, where its range appears to fall within a small area where the Himalayan, Karakoram and Hindu Kush Mountain Ranges meet (Zahler, 1996; Zahler & Woods, 1997; Molur *et al.*, 2005; Dinets, 2011; Qamar *et al.*, 2012; Din *et al.*, 2015).

More recently, *Eupetaurus* has been recorded by camera traps from the Upper Bhagirathi Basin, Uttarakhand, north-western India, at elevations of 2700 and 4800 m a.s.l. (Pal *et al.*, 2018, 2020). On the basis of the colour of the animals and their geographical location, we regard these records as representing *E. cinereus*. This indicates a wider geographical and elevational range of occurrence for this species along the western margins of the Himalayas. The increasing use of camera-trap survey techniques might demonstrate that the species occurs in areas intermediate between the widely separated known localities in the Gilgit region of Pakistan and the Bhagirathi Basin of India, perhaps even extending into western Nepal.

*Natural history:* This species resides on cliffs and rock faces at high elevations, and individuals are not normally tree dwellers except when feeding (Roberts, 1997; Zahler & Woods, 1997). Within Pakistan, the habitat of *E. cinereus* is characterized by patchy forests, with herbs and shrubs of the genus *Artemisia* L., juniper (*Juniperus excelsa* M.Bieb.), Chilgoza pine (*Pinus gerardiana* Wall. ex D.Don), blue pine (*Pinus wallichiana* A.B.Jacks.), Morinda spruce [*Picea smithiana* (Wall.) Boiss.] and oaks (*Quercus* L. spp.) > 2000 m a.s.l. (Zahler & Woods, 1997; Zahler & Karim, 1999). In India, alpine vegetation associated with the 2700 m record includes *Bistorta affinis* (D.Don) Greene, *Gentiana* L. spp., *Potentilla* L. spp., *Primula* L. spp., *Rhodiola* L. spp. and *Rhododendron anthopogon* D.Don. The nearest forest was located 4 km downhill of this sighting and was dominated by *Abies pindrow* (Royle ex D.Don) Royle, *Betula utilis* D.Don and *Rhododendron campanulatum* D.Don. The 4800 m record was lacking any woody or arborescent vegetation, which contrasts with other records that typically associate the species with scattered conifers (Pal *et al.*, 2018).

In the original taxonomic description of the genus, Thomas (1888) speculated that it might feed on fungi, lichens, mosses and other rock-loving plants in its high-elevation environment. Roberts (1997) proposed that the buds and cones of the Morinda spruce (*Picea smithiana*) may be an important food source for *E. cinereus*, because buds occur in spring and cones in summer, which are shed in winter. Indeed, Zahler & Woods (1997) found that one captive specimen would

eat the buds of Morinda spruce but refused all fruits, nuts and other food offered. More recently, faecal samples from four individuals were found to contain 92–100% pine needles (Zahler & Khan, 2003). Other observations have found this species to consume the buds of blue pine, juniper, spruce, oaks, Chilgoza pine and deodar [*Cedrus deodara* (Roxb. ex D.Don) G.Don]. In August and September, they are also thought to visit walnut trees (*Juglans regia* L.), although it is not clear what parts of the plants they eat (Mirza & Rasool, 2005).

Known predators of *E. cinereus* include the red fox [*Vulpes vulpes* (Linnaeus, 1758)], snow leopard [*Panthera uncia* (Schreber, 1775)] and eagle owl [*Bubo bubo* (Linnaeus, 1758)] (Zahler, 1996, 1998; Zahler & Dietemann, 1999; Qamar *et al.*, 2012; Pal *et al.*, 2020).

This species appears to be nocturnal, solitary and active all year round (Zahler, 1996). A nest attributed to this species was reported from a shelf in a cave at 3230 m a.s.l. in Jutal Nala, northern Pakistan, which was made of bark and branches of juniper and grasses and looked like a flat bowl measuring 500 mm × 400 mm (Oshida *et al.*, 2005). A specimen has also been recorded in Sai Nullah (Gilgit, Pakistan) coming out of an old oak tree at ~2590 m a.s.l. Thus, there appears to be some flexibility in nesting locations if tree hollows are available (Mirza & Rasool, 2005). An immature specimen at BMNH collected on 17 April suggests that breeding occurs early in spring and that two litters in a year could be produced (Roberts, 1997). This is supported by observations of two or three young being produced per litter, with young observed in spring and in late summer (Zahler & Woods, 1997).

*Conservation:* *Eupetaurus cinereus* is threatened by habitat loss owing to large-scale clear cutting of forests, particularly the destruction of high-elevation pine woodlands (Zahler & Woods, 1997; Zahler & Khan, 2003). It is also threatened to a lesser extent by expansion of agriculture, small-scale logging, infrastructure development and human settlements (Molur *et al.*, 2005). The total population size was estimated to be between 1000 and 3000 individuals within the known range in Pakistan in the mid-1990s (Zahler & Woods, 1997). It is currently classified as Endangered by the International Union for Conservation of Nature (IUCN) (Zahler, 2010), because it was considered likely to have suffered a recent reduction in population numbers from habitat loss (Rao & Marwat, 2003; Hasan, 2008).

The recent discovery of the species in the state of Uttarakhand in north-western India (Pal *et al.*, 2018, 2020) demonstrates that it might have a considerably wider distribution than previously realized and

indicates that protection and conservation in India is also fundamental for the long-term survival of *E. cinereus*. The species is included in Schedule II (Part II) of the Indian Wildlife (Protection) Act 1972 (Molur *et al.*, 2005; Pal *et al.*, 2018).

Hunting is not thought to be a major threat to this species. The species might receive some traditional respect and *de facto* protection because it is considered to be a source of a material called salajit (also spelt *salaajet* or *shilajit*), which is thought to be a mixture of flying squirrel urine and faecal pellets and rock leachate (Zahler, 1996; Zahler & Karim, 1998; Meena *et al.*, 2010). Salajit is important in traditional medicine (Hooper, 1903) and is collected from caves and sold in medicinal potions used to treat various diseases (Zahler, 1996; Zahler & Karim, 1998; Meena *et al.*, 2010). Historical references regarding the collection and use of salajit (e.g. Hooper, 1903) might provide clues concerning the historical distribution of *E. cinereus* or other *Eupetaurus* species in the Himalayan region, although other high-elevation species of flying squirrels, including the Kashmir flying squirrel [*Eoglaucomys fimbriatus* (Gray, 1837)], might also be sources of the substance (Pyke, 2001).

***EUPETAURUS TIBETENSIS* JACKSON, HELGEN, Q. LI  
& JIANG SP. NOV.**

*Suggested common name:* Tibetan woolly flying squirrel.

*Zoobank registration:* urn:lsid:zoobank.org:act:19DA79D4-7E20-4EB6-A1C7-2C22C6F21D58

*Holotype:* NML 19524, adult, skin and skull, collected in ‘Tibet’. Sequences of *Cytb* for this specimen are deposited in GenBank (no. AY331673).

This specimen was first discussed by Anderson (1879), who left it taxonomically unidentified. When describing *E. cinereus* as a new genus and species, Thomas (1888) speculated that Anderson’s Tibetan specimen was also a *Eupetaurus*, a point later confirmed by Jentink (1890), who figured the skull of this specimen. Little is known about the collection details for this specimen other than that it is ‘said to be from Tibet’ (Jentink, 1890: 143). Corbet & Hill (1992: 314) noted that the association of the skull and skin for this specimen suggest that ‘it is not a trade skin’ (i.e. it is probably a wild-collected animal). To us, this specimen, when considered alongside the paratype skin obtained in a market in the Tibetan town of Gyantse (also spelt Gyangze, 江孜) in 1909, establishes the historical occurrence of this species in the south-central portion of the Tibetan Plateau (see below).

*Paratype:* BMNH 23.11.10.2, skin, with partial skull *in situ* inside the skin, probably female by examination of the specimen, ‘bought in Gyantze Bazaar’ (earlier tag reads ‘Gyantsi Bazaar’), Tibet, collected in June 1909 by Colonel F. M. Bailey [Bailey was British Trade Agent at Gyantsi and Chumbi (春丕) in Tibet at that time; Bailey, 1945].

*Referred specimens:* Two specimens from the state of Sikkim in north-eastern India: BMNH 88.9.29.1, skin, with skull fragments removed from skin (anterior of mandibular rami, preserving incisors; anteriormost cranium preserving incisors, premaxillae and nasals), from ‘Sikkim?’, received from W. T. Blanford from the ‘Mandelli collection’ (thus apparently collected by L. Mandelli); and ZSI 19103, skin, from ‘North Sikkim, alt. 3000 m’ (Agrawal & Chakraborty, 1970), elevation also reported as ‘9000 feet’ (Zahler & Woods, 1997).

*Type locality:* Labels associated with the holotype indicate only that it was collected in ‘Tibet’. The paratype specimen at BMNH was obtained from the bazaar at Gyantse (as ‘Gyantsi Bazaar’). Here, we accordingly fix the type locality as ‘vicinity of Gyantse Town’, Tibet (= Xizang). Gyantse is situated at an elevation of 4000 m a.s.l. in the Nyang Chu Valley (年楚河谷), Shigatse (日喀则), southern Tibet.

*Diagnosis:* *Eupetaurus tibetensis* differs from *E. cinereus* in having more saturated brown pelage, tinged with reddish tones (typically more clear grey in *E. cinereus*) and from *E. nivamons* in having a black tail tip that is much shorter (approximately half the length of the tail in *E. nivamons*). The rostrum is similar to *E. cinereus* and narrower than *E. nivamons*. The temporal ridges are convergent posteriorly, as in *E. cinereus*, rather than parallel, as in *E. nivamons*. The cusps and ridges of cheek teeth are more robust than in *E. nivamons* but less robust than in *E. cinereus*. Upper cheek teeth are heart shaped, as in *E. cinereus*, and differ from the rounded shape in *E. nivamons*. Lower molars are subrectangular, as in *E. nivamons*, and differ from the subsquare ones in *E. cinereus*, with only one long anterior fossetid per lower molar (two short anterior fossetids in *E. nivamons*; one short anterior fossetid in *E. cinereus*). Overall, the dentition of *E. tibetensis* resembles that of *E. cinereus* more than *E. nivamons*, but the external appearance of *E. tibetensis* is similar to *E. nivamons*.

*Descriptive notes:* In the available specimens of *E. tibetensis*, overall body size is similar to *E. cinereus*, with a head–body length of 468 mm in the holotype (with the imperfect, broken tail measuring 350 mm). The dorsal pelage is brownish grey, with less extensive

frosting of the fur tips than seen in *E. cinereus*, and with reddish tones sometimes evident along the midline of the dorsum, on the rump and on the proximal portion of the tail. The underparts are greyish, washed with yellow. The dorsal surfaces of the forefeet and hindfeet are brown. The tail is bushy and cylindrical, with coloration similar to the body, except for a short black tip. The skull and dentition are as described above for the genus *Eupetaurus* and diagnosis of the species.

**Etymology:** The species name is derived from its occurrence in Tibet, where the holotype and paratype originated.

**Distribution:** Records of occurrence that we attribute to *E. tibetensis* originate from elevations of 2700–4000 m a.s.l. in Tibet (= Xizang) in China, Sikkim in India and (more tentatively) from Bhutan. This species is known for certain from two specimens from Tibet and two specimens from Sikkim, discussed above. *Eupetaurus* has also been reported from Bhutan (Wangchuk *et al.*, 2004), and given the proximity of Bhutan to vouchered records from south-central Tibet and north Sikkim, we suggest that these Bhutanese observations are likely to represent *E. tibetensis*. We are not aware of vouchered specimens or specific published records from Bhutan, only general statements about its occurrence: Wangchuk *et al.* (2004) noted that it was found in coniferous, rhododendron and subalpine forests > 2700 m a.s.l.; Srinivasulu & Srinivasulu (2012) specified that it was known from western Bhutan; and Rinchen (2009) suggested that it might occur in Jigme Dorji National Park in north-western Bhutan. No records of *Eupetaurus* have yet been noted from Nepal (Mitchell, 1979; Thapa *et al.*, 2016).

In summary, we suspect that the distribution of *E. tibetensis* comprises the far southern portion of the central Tibetan Plateau and the northern slopes of the Himalayas in Sikkim and Bhutan (Fig. 10).

**Natural history:** Currently, there is little known about the ecology of *E. tibetensis*. Commencing research on this species to understand its distribution, ecology and conservation status is an urgent need.

**Conservation:** The conservation status of *E. tibetensis* remains unknown. We recommend an IUCN Red List categorization of Data Deficient for the species. Surveys are needed to determine the extent of its distribution, including whether it occurs in protected areas, such as Jigme Dorji National Park in Bhutan, and if it is facing particular threats, such as deforestation or hunting.

***EUPETAURUS NIVAMONS* Q. LI, JIANG, JACKSON & HELGEN SP. NOV.**

**Suggested common name:** Yunnan woolly flying squirrel.

**Zoobank registration:** urn:lsid:zoobank.org:act:BE1BF61A-769A-42D6-8B11-56ECC0A871C8

**Holotype:** KIZ 034190 (field number BS1601), young adult female, skin, skull, and body preserved in ethanol, collected in January 2017. Sequences for 12S (rRNA) (GenBank no. MW699658), 16S (GenBank no. MW699662), *Cytb* (GenBank no. MW699650) and *IRBP* (GenBank no. MW699654) are deposited in GenBank.

**Type locality:** The holotype was collected on Biluo Snow Mountain, behind the village of Nageluo (娜格洛) (27°53'23.54"N, 98°45'43.90"E), Bangdang Township (棒当乡), Gongshan County, Nujiang Prefecture, Yunnan Province, China.

**Paratypes:** Five specimens from the type locality: KIZ 034191 (field number BS1602), immature female, whole body preserved in ethanol; KIZ 034192 (field number BS1603), immature female, cleaned skull with body preserved in ethanol; KIZ 035088 (field number 20171101), adult female, skin, skull with body preserved in ethanol; KIZ 035087 (field number 20171102), adult male, skin, skull with body preserved in ethanol; and KIZ 035086 (field number 20171103), adult male, whole body preserved in ethanol.

**Referred specimens:** KIZ 034189 (field number GS16078), immature female, skull, skin, and body preserved in ethanol, collected from Nanmowanshan Pass (贡山-巴城人马驿道丫口), Mount Gaoligong, Gongshan, Yunnan. Two additional skins without skulls (KIZ 003299 and KIZ 003310), purchased at Lijiang or Gongshan, Yunnan in 1973 by Yingxiang Wang (Yang & Wang, 1989) (the original label locality was written as Lijiang, which was later altered to Gongshan).

**Diagnosis:** *Eupetaurus nivamons* differs from *E. cinereus* in its more saturated brown dorsal pelage (clearer grey dorsal pelage in *E. cinereus*) and closely resembles the external appearance of *E. tibetensis*, but its black tail tip is longer. The rostrum of *E. nivamons* is wider than in *E. cinereus* and *E. tibetensis*; its temporal ridges are parallel rather than posteriorly convergent as in *E. cinereus* and *E. tibetensis* (Table 3). Cheek-teeth cusps and ridges are weakest among the taxa; the protocone and hypocone are not as developed as in the other two species, making the upper cheek teeth round



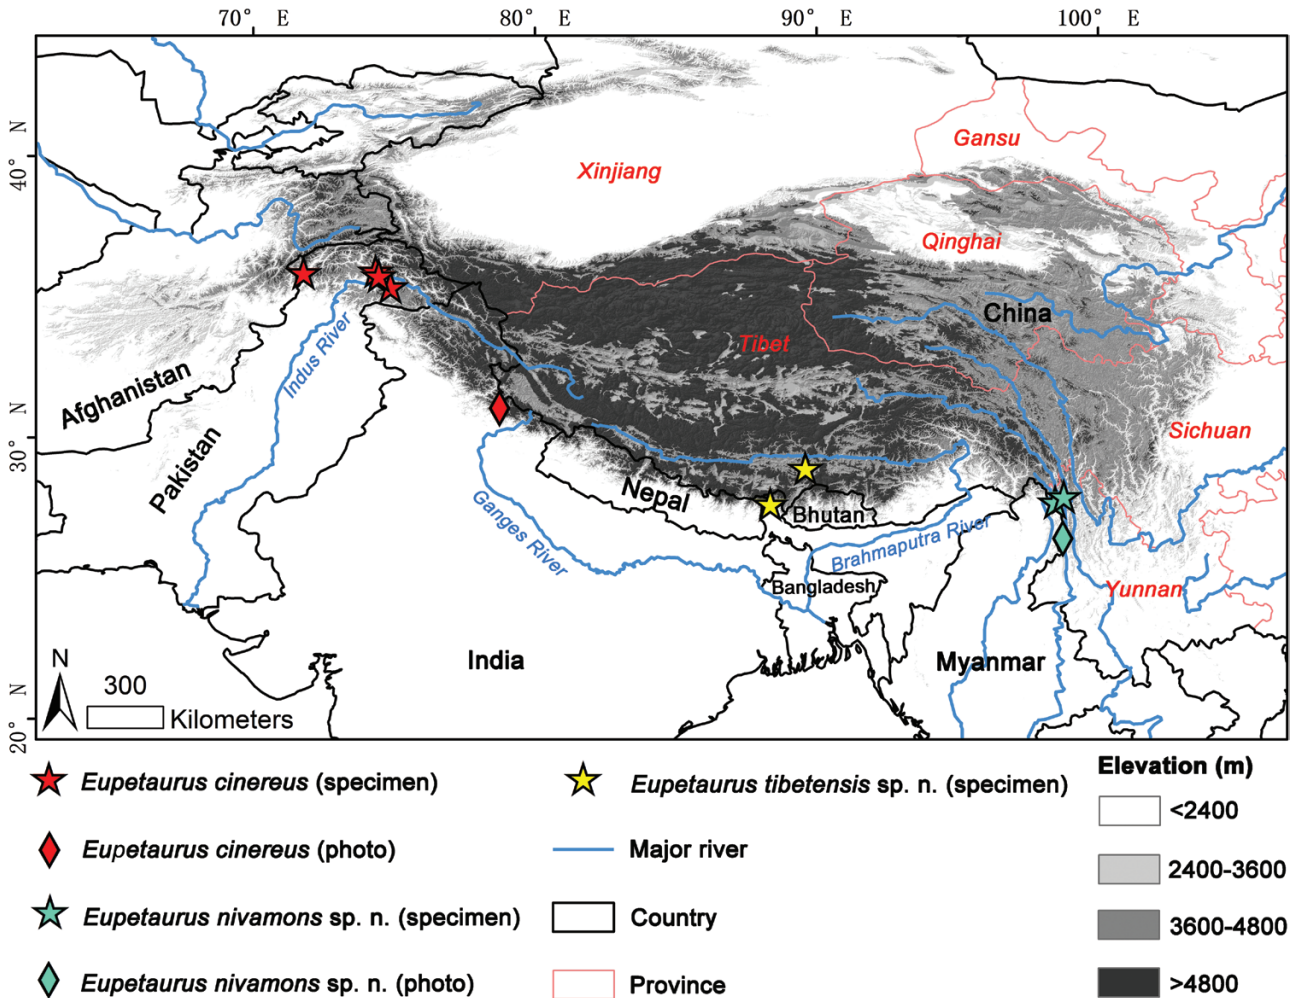

**Figure 10.** Known localities of the three species of *Eupetaurus*.

in shape rather than heart shaped. Its lower molars are subrectangular, as in *E. tibetensis*, and less robust than the subsquare molars of *E. cinereus*. *Eupetaurus nivamons* has two short anterior fossitids in the lower molars (one long anterior fossitid in *E. tibetensis*; one short anterior fossitid in *E. cinereus*) (Figs 7, 8).

**Descriptive notes:** *Eupetaurus nivamons* is slightly smaller than *E. cinereus* (holotype head-body length 419 mm, tail length 440 mm, hind foot length 90 mm, ear length 44.5 mm and mass 1420 g). The dorsal pelage is grizzled greyish brown. The same colour extends to the forehead, turning pale grey along the cheeks to the throat. Ventral pelage is light ashy, with a median longitudinal line of coarse hairs. The margin of the patagium is black. The dorsal surfaces of the manus and pes are black, mixed with scattered straw-coloured hairs. The ears are pointed and hairy, externally black and internally white washed with khaki. The proximal half of the tail is similar in colour to the back but browner, and the distal half is black. A pale

marking round the lower half of the otherwise brown body has been observed in one camera-trapped animal at Mount Gaoligong, Yunnan Province, China (Wang Jianhua, pers. obs.). The skull and dentition are as described above for the genus *Eupetaurus* and diagnosis of the species.

**Etymology:** The specific name is composed of the Latin *nivalis*, snowy, and *mons*, mountain. It is a noun in apposition.

**Distribution:** According to specimens, camera-trap images/videos and sightings by local people, *E. nivamons* is currently known from the alpine zone (3400–4450 m) on Mount Gaoligong [the watershed of the Ayeyarwady (= Irrawaddy) River and the Nu (= Salween) River] and Biluo Snow Mountain (the watershed of the Nu River and the Mekong River) (Fig. 10). Given that the known distribution runs along the Chinese side of the border with Myanmar, the species is likely to occur in suitable habitats immediately across the border in north-eastern



Myanmar (similar to the case of the recently described gibbon *Hoolock tianxing* Fan *et al.*, 2017). It should also be sought in alpine areas of far south-eastern Tibet situated east of the Brahmaputra River (Fig. 10).

**Natural history:** The specimen KIZ 034189 was collected from a cliff at an elevation of 3700 m a.s.l. near the spine of Mount Gaoligong. The surrounding natural vegetation is a mosaic of swamp meadows and dense shrubs ~0.5 m high. The main plants are currants (*Ribes* L.), barberries (*Berberis* L.), willows (*Salix* L.), roses (*Rosa* L.), rhododendron (*Rhododendron* L.) and juniper (*Juniperus squamata* Buch.-Ham. ex D. Don). The mean annual temperature is 3.9 °C, ranging from a low of -12.5 °C in January to a high of 19.6 °C in August. Mean annual humidity is 94.4%, ranging from a low of 70% in November to a high of 100% from April to September, except August [data from a nearby combined temperature and

humidity meter (ibutton-MAXIM DS1923); [Supporting Information, Supplementary Data SD8](#)]. All camera-trap photographs and videos of *E. nivamons* were taken from similar cliff habitats at 3700–4450 m a.s.l. on Mount Gaoligong (Fig. 11).

Large, round faecal pellets and partly eaten plant material were scattered under juniper scrub (*Juniperus squamata*) near the high-elevation cliff of Mount Gaoligong. Given that no other large rodents were documented in this habitat, we interpret this as evidence that juniper is an important food plant for *E. nivamons* in the area.

Potential predators of *E. nivamons* include the tawny owl (*Strix aluco* Linnaeus, 1758), leopard cat [*Prionailurus bengalensis* (Kerr, 1792)] and Siberian weasel (*Mustela sibirica* Pallas, 1773).

Camera-trap observations ( $N = 31$ ) show that *E. nivamons* is active throughout the year, with a peak in October; and it is active from 19.30 to 06.00 h, with

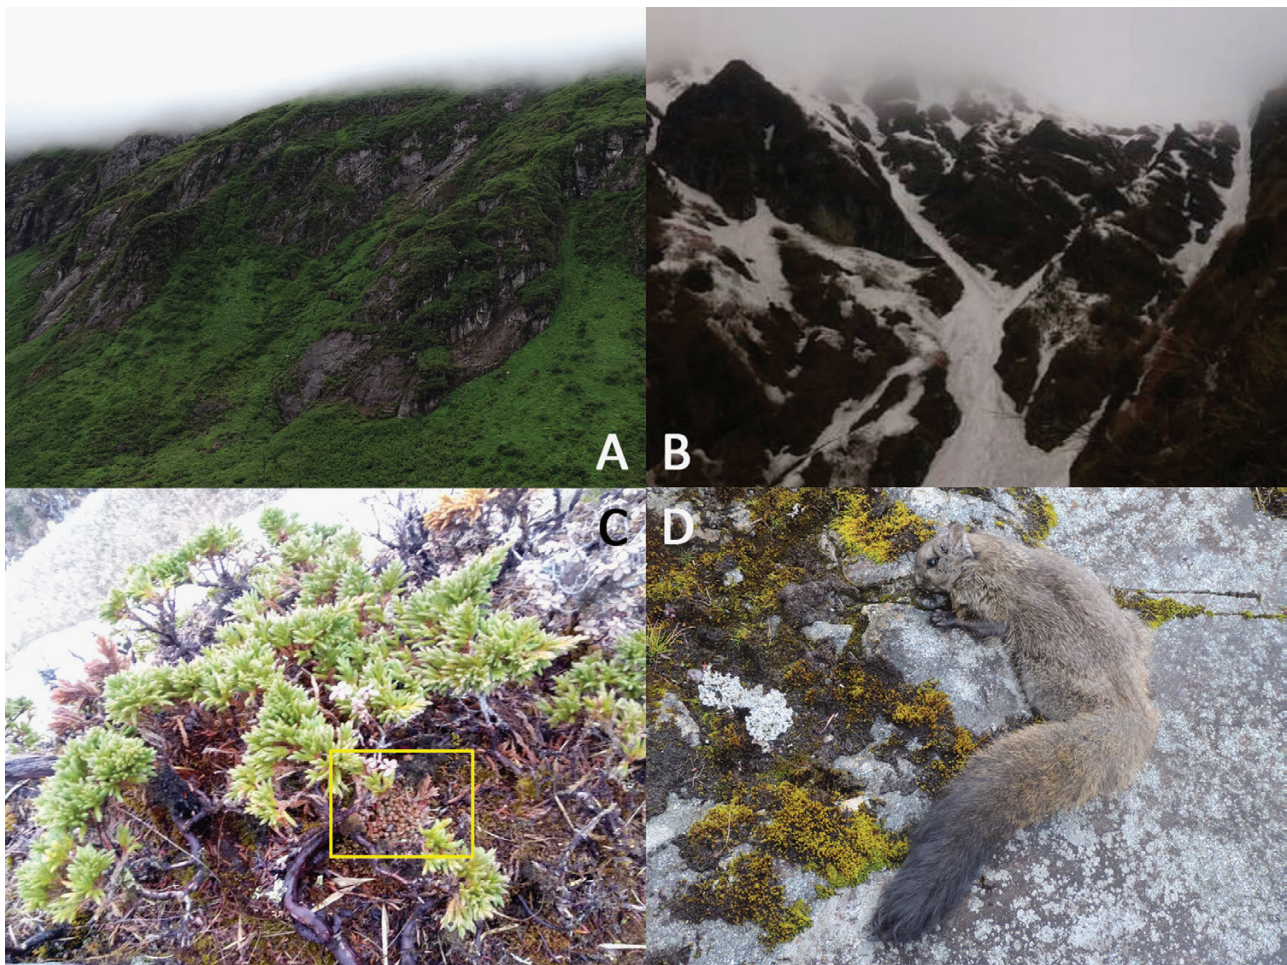

**Figure 11.** General view of habitat of *Eupetaurus nivamons*: A, summer view; B, winter view; C, faecal pellets and partly eaten plants (yellow square) under *Juniperus squamata*; and D, *E. nivamons*.

a peak from 19.30 to 00.00 h. Even in winter, fresh faecal pellets can be found on top of the snow under juniper shrubs, indicating that *E. nivamons* does not hibernate or migrate from the area during the coldest months of the year (Ge Gao, pers. obs.).

**Conservation:** We have documented this species at two principal localities, Mount Gaoligong and Biluo Snow Mountain. Mount Gaoligong is within a nationally protected nature reserve, whereas Biluo Snow Mountain has not been gazetted as a protected area. Owing to its high-elevation cliff habitat, far away from human settlements and covered by heavy snow for more than half of the year, *E. nivamons* is probably not heavily affected by human activities. The only known direct threat we documented is poaching for meat by herb collectors who visit the area from June to October. Given the apparent rarity of the animal and relatively small habitat area, we recommend an IUCN Red List classification of Near Threatened for this species. The loss of alpine habitats owing to ongoing climate change is a potential threat to the species in the near future.

## DISCUSSION

### PHYLOGENETIC POSITION OF *EUPETAURUS*

The high-crowned cheek teeth of *Eupetaurus* have attracted biological interest since the genus was first described (Thomas, 1888). In rodents, the evolution of hypsodont teeth involves modifications that result in cheek-tooth cusps that cease to interlock, which can improve the mechanical strength and effectiveness of cheek teeth, but may also obscure homologous landmarks on premolars and molars, making morphological relationships difficult to decipher (McKenna, 1962). Hypsodonty has evolved repeatedly in various lineages across the Rodentia (Williams & Kay, 2001), but *Eupetaurus* is the only hypsodont member of the Pteromyini. The cheek teeth of *Eupetaurus* are thus superficially different from all other flying squirrels and also different from other hypsodont rodents. In particular, the lower cheek teeth

have two obvious buccal flexa and only one prominent lingual flexus, the reverse situation to most hypsodont rodents (a single buccal flexus and two or more lingual ones) (McKenna, 1962).

The genus was removed from Sciuridae and placed in its own family, Eupetauridae, by Schaub (1953: 395) (also Grassé & Dekeyser, 1955; Schaub, 1958) partly because of its highly derived dentition, but also owing to fundamental misconceptions in interpreting published images of the teeth of *Eupetaurus*. However, in a major overview of the relationships and dental anatomy of *Eupetaurus*, McKenna (1962) demonstrated that *Eupetaurus* is clearly referable to the Sciuridae (along with other flying squirrels, recognized at that time within the subfamily Petauristinae). He suggested that *Aeretes* G. M. Allen, 1940, *Eupetaurus* and *Petaurista* Link, 1795 constitute a natural group (the ‘*Petaurista* group’) and considered the dentition of *Eupetaurus* to be most like *Petaurista*, probably originating from a cheek-tooth pattern similar to *Petaurista xanthotis* Milne-Edwards, 1872. In a later review, Mein (1970) augmented McKenna’s (1962) scheme by also transferring the genera *Belomys* Thomas, 1908, *Pteromys* G. Cuvier, 1800, *Pteromyscus* Thomas, 1908 and *Trogopterus* Heude, 1898 to the ‘*Petaurista* group’ based on perceived dental synapomorphies. Thorington *et al.* (2002) later moved an additional genus, *Aeromys* Robinson & Kloss, 1915, to the ‘*Petaurista* group’, drawing on a phylogenetic analysis of flying squirrels using 80 morphological characters.

More recent work has focused on reconstructing relationships among the various flying squirrel genera using genetic data. Yu (2002) used partial mitochondrial *Cytb* gene sequences for seven flying squirrel genera to study the relationships of *Eupetaurus* and found that the level of estimated pairwise-sequence divergence observed among *Eupetaurus* and *Petaurista* or *Pteromys* is greater than that observed between *Eupetaurus* and *Belomys*, *Glaucomys* Thomas, 1908, *Hylopetes* Thomas, 1908 or *Trogopterus*. Subsequently, researchers have used three gene fragments (12S, 16S

### KEY TO THE SPECIES OF *EUPETAURUS*

- |                                                                                                                                                                                                                 |                                     |
|-----------------------------------------------------------------------------------------------------------------------------------------------------------------------------------------------------------------|-------------------------------------|
| 1a. Temporal ridges parallel. Rostrum wide. Upper cheek teeth round in shape; lower molars have two anterior fossettids .....                                                                                   | <b><i>Eupetaurus nivamons</i></b>   |
| 1b. Temporal ridges converge posteriorly. Rostrum narrow. Upper cheek teeth heart shaped; lower molars have one anterior fossettid .....                                                                        | 2                                   |
| 2a. Cusps and ridges of cheek teeth are robust; P <sup>4</sup> and P <sub>4</sub> significantly larger than the following molars; lower molars are subsquare in shape; anterior fossettid short .....           | <b><i>Eupetaurus cinereus</i></b>   |
| 2b. Cusps and ridges of cheek teeth are less robust; P <sup>4</sup> and P <sub>4</sub> approximately equal in size to the following molars; lower molars subrectangular in shape; anterior fossettid long ..... | <b><i>Eupetaurus tibetensis</i></b> |



and *IRBP*) to reconstruct the phylogenetic tree of most flying squirrel genera (Mercer & Roth, 2003; Lu *et al.*, 2013; Casanovas-Vilar *et al.*, 2018). These studies found that *Eupetaurus* falls into a major clade with generic membership similar to the *Petaurista* group as proposed by Thorington *et al.* (2002), and more specifically, with *Eupetaurus* recovered as sister to the genus *Aeromys*. More recently, Li *et al.* (2020) included the most recently described flying squirrel genus, *Biswamoyopterus Saha, 1981* (Sanamxay *et al.*, 2013; Li *et al.*, 2019), not previously included in morphological and genetic comparisons, in a phylogenetic analysis drawing on the same markers (12S, 16S and *IRBP*). That study recovered a sister relationship between *Biswamoyopterus* and *Aeromys*, which together were most closely related to *Eupetaurus*.

In the present study, our ML tree also recovered a sister relationship between *Eupetaurus* and *Aeromys* + *Biswamoyopterus*, but our BI tree showed a different topology, with *Eupetaurus* in a more isolated phylogenetic position, recovered as sister to a larger clade consisting of *Aeromys*, *Belomys*, *Biswamoyopterus*, *Pteromys*, *Pteromyscus* and *Trogopterus* (Fig. 4). Some intergeneric relationships are now clear. Five monophyletic clades can be identified clearly in the Pteromyina by the consensus of our ML and BI trees (Fig. 4): (1) a *Eupetaurus* clade including *Eupetaurus* only; (2) a *Pteromys* clade including *Pteromys* only; (3) a *Petaurista* clade including *Petaurista* and *Aeretes* (genetic samples of *Aeretes* are unavailable, but the close relationship between *Aeretes* and *Petaurista* is a consensus of morphological studies; McKenna, 1962; Mein, 1970; Thorington *et al.*, 2002); (4) an *Aeromys* clade including *Aeromys* and *Biswamoyopterus*; and (5) a *Trogopterus* clade including *Trogopterus*, *Belomys*, and *Pteromyscus*.

More comprehensive molecular phylogenetic comparisons are needed to resolve the deeper intergeneric splits between these lineages fully, including the exact phylogenetic placement of *Eupetaurus*. In the meantime, our morphological comparisons provide additional information that suggests a clearer placement of *Eupetaurus*. We note that: (1) the metaconule is similarly reduced in *Eupetaurus* and the *Aeromys* clade, but prominent in *Pteromys*, the *Petaurista* clade and the *Trogopterus* clade; (2) the interpremaxillary foramen (Hill, 1935) and greater palatine foramina are more expansive in *Eupetaurus* and the *Aeromys* clade than in other flying squirrels; and (3) the enamel faces of the incisors are pale yellow in *Eupetaurus* and *Biswamoyopterus*, but usually orange in other flying squirrels. Presuming that these might represent synapomorphic characters, we hypothesize that our ML tree is a better indication of the true evolutionary relationships in this group of genera: that is,

*Eupetaurus* is the sister genus of the *Aeromys* clade (*Aeromys* + *Biswamoyopterus*).

#### NEW INTERPRETATIONS OF SIMILARITY OF CHEEK TEETH

McKenna (1962) proposed that the occlusal morphology of the cheek teeth of *Eupetaurus* was closest to, and derived from, a pattern most similar to *Petaurista*. Evidence for this was that a posterolingual diagonal flexus exists only in *Eupetaurus* and *Petaurista/Aeretes*, and this was interpreted as a homologous apomorphy (Fig. 9). We recognize that there are three different types of flexus/notch on the lingual side of the upper cheek teeth in Pteromyini: one in front of the protocone on the anteroloph (anterior flexus/notch); one between the protocone and hypocone on the endoloph (central flexus/notch); and one between the protocone and the metaconule-derived pseudohypocone on the posteroloph (posterior flexus/notch) (Fig. 9). Flying squirrel taxa can have no lingual flexus/notch or up to three types of lingual flexus/notch. Traces of the protocone and hypocone can be found on two sides of the 'posterolingual diagonal flexus' of *Eupetaurus*, and a possibly homologous central notch can be found in the *Aeromys* and *Trogopterus* clades, which are genetically close to *Eupetaurus*, demonstrating that the 'posterolingual diagonal flexus' of *Eupetaurus* is a central flexus. *Petaurista* and *Aeretes* do not develop the hypocone on the endoloph; their 'posterolingual diagonal flexus' is instead a posterior flexus, which lies between the protocone and the metaconule-derived pseudohypocone.

McKenna (1962) also suggested that the lower cheek teeth of *Eupetaurus* evolved from a pattern most like *Petaurista xanthotis*, suggesting a possible phylogenetic relationship with *Petaurista*. We found that the paraconid and protoconid of *Petaurista/Aeretes/Pteromys* are not merged on the lower molars, revealing four distinct buccal cusps, whereas the paraconid and protoconid of the *Eupetaurus/Aeromys* clade/*Trogopterus* clade are merged on the lower molars, revealing three distinct buccal cusps (Fig. 9).

#### BIOGEOGRAPHY AND ADAPTATION OF *EUPETAURUS*

*Eupetaurus* species are endemic to alpine habitats across the Himalayan region, suggesting that their evolution is closely tied to the geological history and environment of the Himalayas. The geological history of the Himalayas and the surrounding area is complex, but some consensus has emerged from recent syntheses (Wang *et al.*, 2014a; Deng & Ding, 2015; Favre *et al.*, 2015; Renner, 2016). One is that a central 'proto-Qinghai-Tibetan Plateau' was uplifted as early as 40 Mya, with subsequent outward extensions



by the early Miocene (Wang *et al.*, 2014a). Then the mountains surrounding the Plateau to the south, west and north began to uplift by the late Miocene (Fang *et al.*, 2005; Brookfield, 2008; Wang *et al.*, 2012; Deng & Ding, 2015). The mountains on the south-eastern edge of the plateau uplifted more recently, mainly between the late Miocene and late Pliocene (Sun *et al.*, 2011; Wang *et al.*, 2014b).

The Himalayas are an evolutionary hotspot for flying squirrels, where many different genera and species co-exist regionally (Corbet & Hill, 1992; Jackson & Schouten, 2012; Li, 2019). Many taxa demonstrate patterns of elevational stratification, probably reflecting patterns of habitat specialization and local competition between related lineages (Smith & Xie, 2008). *Eupetaurus* occupies the highest elevational range of flying squirrels in the region, and its deep phylogenetic isolation and morphological specializations indicate that it has probably occupied this niche for many millions of years. Our study estimates that the evolutionary divergence between *Eupetaurus* and other flying squirrels occurred during the early to mid-Miocene (95% CI = 13.72–20.46 Mya), similar to the timing when at least the south-west Himalayas probably reached their current elevation (Garzone *et al.*, 2000; Murphy *et al.*, 2009; Saylor *et al.*, 2009; Wang *et al.*, 2012).

The Himalayas are not only the highest mountain range on Earth, but also possess the steepest river gorges, such as the Indus, Ganges, Brahmaputra, Salween, Mekong and other major river systems (Brookfield, 1998). These deep gorges cut the alpine habitats suitable for *Eupetaurus* into multiple 'sky islands', between which lowland tropical and subtropical habitats hinder the movement of alpine species, which can consequently result in the isolation of populations and allopatric evolution between 'islands' (He & Jiang, 2014; Ai *et al.*, 2018; Wan *et al.*, 2018; He *et al.*, 2019). However, 10 Mya the drainages were completely unlike those of today, with all the major rivers of South Asia running along parallel structural belts (Brookfield, 1998). After the late Miocene, the uplift of the Himalayas began to be slower than the headward erosion, which extended back onto the plateau to capture major originally latitudinal drainages to form the great sigmoidal bends of the current river system (Brookfield, 1998). River capture first occurred in the Ganges system and later in the Indus and Brahmaputra river systems (Brookfield, 1998). The order of river capture is consistent with the pattern of *Eupetaurus* speciation documented in our study: *E. cinereus* on the west side of the Ganges first split with an eastern lineage (*E. nivamons* + *E. tibetensis*) in the mid- to late Miocene (95% CI = 6.89–13.83 Mya), after which *E. nivamons* on the east of the Brahmaputra split from *E. tibetensis*

on the west side in the late Miocene or at the Pliocene–Pleistocene boundary (95% CI = 2.28–6.98 Mya). We imagine that a common ancestor of living *Eupetaurus* species might once have had a more continuous distribution across Himalayan alpine habitats, with the evolution of river systems since the mid-Miocene promoting allopatric speciation across the region.

#### RESEARCH OUTLOOK

For most of the 20<sup>th</sup> century, *Eupetaurus* was the most enigmatic and least studied of all Asian squirrel genera. Only now is the biological diversity represented in the genus becoming understood, with our study demonstrating the presence of three distinctive species of *Eupetaurus* occurring across the Himalayan region. New fieldwork, especially using camera-trapping techniques, continues to expand the known range of the genus, with previously overlooked populations of *E. cinereus* and *E. nivamons* recently discovered in north-western India (Pal *et al.*, 2018; 2020) and Yunnan (Gao *et al.*, 2017), respectively. There are still large gaps between the known ranges of the three species, and targeted fieldwork is likely to document further populations and perhaps even additional species in the genus. For example, it is not clear whether *Eupetaurus* occurs in the eastern margin of the Tibetan Plateau in the Qinghai, Gansu and Sichuan Provinces of China. It is important to document the current range of occurrence for *E. tibetensis*, which has not been documented by a museum specimen or other firmly documented record for a half century, but the species is likely to occur in Sikkim, southern Tibet and western Bhutan. Considering that the evolution and speciation of *Eupetaurus* are closely related to the Himalayan orogeny, the discovery of additional geographical populations of *Eupetaurus* might further enhance our understanding of geological history of the Himalayas and forming of the major rivers in South Asia, in addition to the ecology and evolution of the largest flying squirrels of the world.

#### ACKNOWLEDGEMENTS

We thank Dazhou Peng, Xueken Wang, Zhijun Long, Jinlin Qian, Chunliao Qian, Gongshan and Lushui Management Bureau of Gaoligongshan National Nature Reserve for their assistance in the field. We appreciate Peter Zahler, Will Duckworth, V. Louise Roth and Richard W. Thorington Jr for helpful suggestions about our paper. Sincere thanks also to Roberto Portela Miguez and Louise Tomsett from the Natural History Museum, London, UK; Dr Krishnamoorthy Venkataraman of the Zoological

Survey of India, Kolkata, India; Hein van Grouw of the Naturalis Biodiversity Center, Leiden, The Netherlands; Darrin Lunde and Melissa T. R. Hawkins from the National Museum of Natural History, Smithsonian Institution, Washington, DC, USA; Marisa Surovy, Eleanor Hoeger and Sara Ketelsen from the American Museum of Natural History, New York, NY, USA; Julian Kerbis Peterhans, Lawrence Heaney and Adam Ferguson from the Field Museum of Natural History, Chicago, IL, USA; and staff at the University of Florida, Gainesville, FL, USA, for access to specimens. We are grateful to Qiang Li, Haowen Tong and Qigao Jiangzuo for discussions on the dentition. We also thank Kunfeng Yang for taking X-ray photographs of skulls, Bin Wang and Jianhua Wang for camera-trap photographs and Bernie Dominiak for providing comments on the manuscript. We are grateful to contributors to the Biodiversity Heritage Library for making historical literature so easily accessible. The authors would also like to thank the reviewers of this manuscript for their many helpful suggestions. The study was supported by the Second Tibetan Plateau Scientific Expedition and Research Program (STEP, grant no. 2019QZKK0501), the National Key Research and Development Program of China (grant no. 2017YFC0505200), the National Natural Science Foundation of China (grant no. 32000304), the Strategic Priority Research Program of Chinese Academy of Sciences (grant no. XDA20050202) and the Biodiversity Survey, Monitoring and Assessment (grant no. 2019HB2096001006). K.M.H. thanks the University of Adelaide, the Natural History Museum (London) and the Australian Museum Research Institute for support. S.M.J., Q.L., and T.W. contributed equally to this work.

#### CONFLICTS OF INTEREST

There were no conflicts of interest.

#### REFERENCES

- Agrawal V, Chakraborty S. 1970.** Occurrence of the woolly flying squirrel, *Eupetaurus cinereus* Thomas (Mammalia: Rodentia: Sciuridae) in north Sikkim. *Journal of the Bombay Natural History Society* **66**: 615–616.
- Ai H-S, He K, Chen Z-Z, Li J-Q, Wan T, Li Q, Nie W-H, Wang J-H, Su W-T, Jiang X-L. 2018.** Taxonomic revision of the genus *Mesechinus* (Mammalia: Erinaceidae) with description of a new species. *Zoological Research* **39**: 335–347.
- Anderson J. 1879.** *Anatomical and zoological researches: comprising an account of the zoological results of the two expeditions to western Yunnan in 1868 and 1875; and a monograph of the two cetacean genera, Platanista and Orcella*. London: Quaritch.
- Bailey FM. 1945.** *China, Tibet, Assam: a journey, 1911*. London: Jonathan Cape.
- Baker RJ, Bradley RD. 2006.** Speciation in mammals and the genetic species concept. *Journal of Mammalogy* **87**: 643–662.
- Brandley MC, Schmitz A, Reeder TW. 2005.** Partitioned Bayesian analyses, partition choice, and the phylogenetic relationships of scincid lizards. *Systematic Biology* **54**: 373–390.
- Brookfield ME. 1998.** The evolution of the great river systems of southern Asia during the Cenozoic India-Asia collision: rivers draining southwards. *Geomorphology* **22**: 285–312.
- Brookfield ME. 2008.** Evolution of the great river systems of southern Asia during the Cenozoic India-Asia collision: rivers draining north from the Pamir syntaxis. *Geomorphology* **100**: 296–311.
- Casanovas-Vilar I, Garcia-Porta J, Fortuny J, Sanisidro Ó, Prieto J, Querejeta M, Llacer S, Robles JM, Bernardini F, Alba DM. 2018.** Oldest skeleton of a fossil flying squirrel casts new light on the phylogeny of the group. *eLife* **7**: e39270.
- Chakraborty S, Agrawal VC. 1977.** A melanistic example of woolly flying squirrel *Eupetaurus cinereus* Thomas (Rodentia: Sciuridae). *Journal of the Bombay Natural History Society* **74**: 346–347.
- Corbet GB, Hill JE. 1992.** *The mammals of the Indomalayan region: a systematic review*. Oxford: Oxford University Press.
- Darriba D, Taboada GL, Doallo R, Posada D. 2012.** jModelTest 2: more models, new heuristics and parallel computing. *Nature Methods* **9**: 772.
- Deng T, Ding L. 2015.** Palealtimetry reconstructions of the Tibetan Plateau: progress and contradictions. *National Science Review* **2**: 417–437.
- Din JU, Khan M, Ghaznavi M, Shah KA, Younus M. 2015.** Note on the giant woolly gliding squirrel *Eupetaurus cinereus* (Mammalia: Rodentia: Sciuridae) in northern Pakistan. *Journal of Threatened Taxa* **7**: 7602–7604.
- Dinets V. 2011.** Observations of the woolly flying squirrel *Eupetaurus cinereus* in Pakistan. *Mammalia* **75**: 277–280.
- Drummond AJ, Suchard MA, Xie D, Rambaut A. 2012.** Bayesian phylogenetics with BEAUti and the BEAST 1.7. *Molecular Biology and Evolution* **29**: 1969–1973.
- Edgar RC. 2004.** MUSCLE: multiple sequence alignment with high accuracy and high throughput. *Nucleic Acids Research* **32**: 1792–1797.
- Emry RJ, Thorington RW. 1984.** The tree squirrel *Sciurus* (Sciuridae, Rodentia) as a living fossil. In: Eldridge N, Stanley SM, eds. *Living fossils*. New York: Springer, 23–31.
- Fan P-F, He K, Chen X, Ortiz A, Zhang B, Zhao C, Li Y-Q, Zhang H-B, Kimock C, Wang W-Z, Groves C, Turvey ST, Roos C, Helgen KM, Jiang X-L. 2017.** Description of a new species of Hoolock gibbon (Primates: Hylobatidae) based on integrative taxonomy. *American Journal of Primatology* **79**: e22631.
- Fang X, Zhao Z, Li J, Yan M, Pan B, Song C, Dai S. 2005.** Magnetostratigraphy of the late Cenozoic Laojunmiao

- anticline in the northern Qilian Mountains and its implications for the northern Tibetan Plateau uplift. *Science in China Series D-Earth Sciences* **48**: 1040–1051.
- Favre A, Päckert M, Pauls SU, Jähmig SC, Uhl D, Michalak I, Muellner-Riehl AN. 2015.** The role of the uplift of the Qinghai-Tibetan Plateau for the evolution of Tibetan biotas. *Biological Reviews* **90**: 236–253.
- Gao G, Wang B, He C, Luo X. 2017.** Biodiversity of birds and mammals in alpine habitat of Mt. Gaoligong, Lushui County, Yunnan. *Biodiversity Science* **25**: 332–339.
- Garzzone C, Dettman D, Quade J, DeCelles P, Butler R. 2000.** High times on the Tibetan Plateau: paleoelevation of the Thakkhola graben, Nepal. *Geology* **28**: 339–342.
- Goodwin HT. 2008.** Sciuridae. In: Janis CM, Gunnell GF, Uhen MD, eds. *Evolution of Tertiary mammals of North America*, Vol. 2, *Small mammals, xenarthrans, and marine mammals*. New York: Cambridge University Press, 355–376.
- Grassé PP, Dekeyser PL. 1955.** Ordre des Rongeurs. In: Grassé PP, ed. *Traité de zoologie: anatomie, systématique, biologie. Volume 17: mammifères, les ordres: anatomie, ethologie, systématique, fascicule 2*. Paris: Masson et Cie, 1321–1525.
- Hammer Ø, Harper DAT, Paul DR. 2001.** Past: Paleontological Statistics Software Package for Education and Data Analysis. *Palaeontologia Electronica* **4**:9.
- Harrison RG, Bogdanowicz SM, Hoffmann RS, Yensen E, Sherman PW. 2003.** Phylogeny and evolutionary history of the ground squirrels (Rodentia: Marmotinae). *Journal of Mammalian Evolution* **10**: 249–276.
- Hasan L. 2008.** An anatomy of state failures in the forest management in Pakistan. *Pakistan Development Review* **46**: 1189–1203.
- Hawkins MTR, Helgen KM, Maldonado JE, Rockwood LL, Tsuchiya MTN, Leonard JA. 2016a.** Phylogeny, biogeography and systematic revision of plain long-nosed squirrels (genus *Dremomys*, Nannosciurinae). *Molecular Phylogenetics and Evolution* **94**: 752–764.
- Hawkins MTR, Leonard JA, Helgen KM, McDonough MM, Rockwood LL, Maldonado JE. 2016b.** Evolutionary history of endemic Sulawesi squirrels constructed from UCEs and mitogenomes sequenced from museum specimens. *BMC Evolutionary Biology* **16**: 80.
- He K, Gutierrez E, Heming NM, Koepfli KP, Wan T, He S, Jin W, Liu S-Y, Jiang X-L. 2019.** Cryptic phylogeographic history sheds light on the generation of species diversity in sky-island mountains. *Journal of Biogeography* **46**: 2232–2247.
- He K, Jiang X. 2014.** Sky islands of southwest China. I: an overview of phylogeographic patterns. *Chinese Science Bulletin* **59**: 585–597.
- He K, Li Y-J, Brandley MC, Lin L-K, Wang Y-X, Zhang Y-P, Jiang X-L. 2010.** A multi-locus phylogeny of Nectogalini shrews and influences of the paleoclimate on speciation and evolution. *Molecular Phylogenetics and Evolution* **56**: 734–746.
- Helgen KM, Cole FR, Helgen LE, Wilson DE. 2009.** Generic revision of the Holarctic ground squirrel genus *Spermophilus*. *Journal of Mammalogy* **90**: 270–305.
- Hill JE. 1935.** The cranial foramina in rodents. *Journal of Mammalogy* **16**: 121–129.
- Hooper D. 1903.** Silajit and ancient eastern medicine. *Journal of the Asiatic Society of Bengal* **72**: 98–103.
- Huchon D, Madsen O, Sibbald MJJB, Ament K, Stanhope MJ, Catzeflis F, de Jong WW, Douzery EJP. 2002.** Rodent phylogeny and a timescale for the evolution of Glires: evidence from an extensive taxon sampling using three nuclear genes. *Molecular Biology and Evolution* **19**: 1053–1065.
- Jackson SM, Schouten P. 2012.** *Gliding mammals of the world*. Melbourne: CSIRO Publishing.
- Jackson SM, Thorington R. 2012.** Gliding mammals: taxonomy of living and extinct species. *Smithsonian Contributions to Zoology* **638**: 1–117.
- Jansa SA, Giarla TC, Lim BK. 2009.** The phylogenetic position of the rodent genus *Typhlomys* and the geographic origin of Muroidea. *Journal of Mammalogy* **90**: 1083–1094.
- Jentink FA. 1890.** Observations relating *Eupetaurus cinereus*, Oldfield Thomas. *Notes from the Leyden Museum* **12**: 143–144.
- Li G, Lwin YH, Yang B, Qin T, Phothisath P, Maung K-W, Quan R-C, Li S. 2020.** Taxonomic revision and phylogenetic position of the flying squirrel genus *Biswamoyopterus* (Mammalia, Rodentia, Sciuridae, Pteromyini) on the northern Indo-China peninsula. *ZooKeys* **939**: 65–85.
- Li Q. 2019.** *Taxonomic study of the flying squirrels (Pteromyini) of Mount Gaoligong*. Unpublished PhD Dissertation, University of Chinese Academy of Sciences.
- Li Q, Li X-Y, Jackson SM, Li F, Jiang M, Zhao W, Song W-Y, Jiang X-L. 2019.** Discovery and description of a mysterious Asian flying squirrel (Rodentia, Sciuridae, *Biswamoyopterus*) from Mount Gaoligong, southwest China. *ZooKeys* **864**: 147–160. doi:10.3897/zookeys.864.33678
- Li Q, Cheng F, Jackson SM, Helgen KM, Song W-Y, Liu S-Y, Sanamxay D, Li S, Li F, Xiong Y, Sun J, Wang H-J, Jiang X-L. 2021.** Phylogenetic and morphological significance of an overlooked flying squirrel (Pteromyini, Rodentia) from the eastern Himalayas with the description of a new genus. *Zoological research (in press)*. doi:10.24272/j.issn.2095-8137.2021.039.
- Lorimer DL. 1924.** Woolly flying squirrel. *Journal of the Bombay Natural History Society* **30**: 219.
- Lu X, Ge D, Xia L, Zhang Z, Li S, Yang Q. 2013.** The evolution and paleobiogeography of flying squirrels (Sciuridae, Pteromyini) in response to global environmental change. *Evolutionary Biology* **40**: 117–132.
- Luo A, Qiao H, Zhang Y, Shi W, Ho SWY, Xu W, Zhang A, Zhu C. 2010.** Performance of criteria for selecting evolutionary models in phylogenetics: a comprehensive study based on simulated datasets. *BMC Evolutionary Biology* **10**: 242.
- McKenna MC. 1962.** *Eupetaurus* and the living petauristine sciurids. *American Museum Novitates* **2104**: 1–38.
- Meena H, Pandey HK, Arya MC, Ahmed Z. 2010.** Shilajit: A panacea for high-altitude problems. *International Journal of Ayurveda Research* **1**: 37–40.



- Mein P. 1970.** Les sciuroptères (Mammalia, Rodentia) Néogènes d'Europe occidentale. *Geobios* **3**: 7–77.
- Mercer JM, Roth VL. 2003.** The effects of Cenozoic global change on squirrel phylogeny. *Science* **299**: 1568–1572.
- Miller MA, Pfeiffer W, Schwartz T. 2010.** Creating the CIPRES Science Gateway for inference of large phylogenetic trees. In: *Proceedings of the Gateway Computing Environments Workshop (GCE)*, 14 November 2010. New Orleans, 1–8.
- Mirza ZB, Rasool G. 2005.** The first report of the post-cranial skeletal measurements of woolly fly [sic] squirrel *Eupetaurus cinerius* [sic], with observations of its behaviour. *Pakistan Journal of Zoology* **37**: 162–164.
- Mitchell RM. 1979.** The sciurid rodents (Rodentia: Sciuridae) of Nepal. *Journal of Asian Ecology* **1**: 21–28.
- Molur S, Srinivasulu C, Srinivasulu B, Walker S, Nameer PO, Ravikumar L. 2005.** *Status of non-volant small mammals: Conservation Assessment and Management Plan (C.A.M.P.) workshop report*. Coimbatore: Zoo Outreach Organisation/CBSG-South Asia.
- Murphy M, Saylor J, Ding L. 2009.** Late Miocene topographic inversion in southwest Tibet based on integrated paleoelevation reconstructions and structural history. *Earth and Planetary Science Letters* **282**: 1–9.
- Oshida T, Shafique CM, Barkati S. 2005.** A note on a new habitat of the woolly flying squirrel *Eupetaurus cinereus* in the northern area of Pakistan. *Mammal Study* **30**: 73–76.
- Pal R, Bhattacharya T, Sathyakumar S. 2020.** Woolly flying squirrel *Eupetaurus cinereus*: a new addition to the diet of the snow leopard *Panthera uncia*. *Journal of the Bombay Natural History Society* **117**. doi: [10.17087/jbnhs/2020/v117/142056](https://doi.org/10.17087/jbnhs/2020/v117/142056).
- Pal R, Thakur S, Bhattacharya T, Sathyakumar S. 2018.** Range extension and high elevation record for the endangered woolly flying squirrel *Eupetaurus cinereus* in western Himalaya, India. *Mammalia* **83**: 410–414.
- Pons J, Barraclough TG, Gomez-Zurita J, Cardoso A, Duran DP, Hazell S, Kamoun S, Sulim WD, Vogler AP. 2006.** Sequence-based species delimitation for the DNA taxonomy of undescribed insects. *Systematic Biology* **55**: 595–609.
- Pyke K. 2001.** Giant Himalayan woolly flying squirrels. *Alpine Journal* **106**: 48–49.
- Qamar QZ, Ali U, Minhas RA, Dar NI, Anwat M. 2012.** New distribution information on woolly flying squirrel (*Eupetaurus cinereus* Thomas, 1888) in Neelum Valley of Azad Jammu and Kashmir, Pakistan. *Pakistan Journal of Zoology* **44**: 1333–1342.
- Rao AL, Marwat AH. 2003.** *Northern areas strategy for sustainable development. Background paper: forestry*. Gilgit: IUCN Northern Areas Programme.
- Renner SS. 2016.** Available data point to a 4-km-high Tibetan Plateau by 40 Ma but 100 molecular-clock papers have linked supposed recent uplift to young node ages. *Journal of Biogeography* **43**: 1479–1487.
- Rinchen D. 2009.** *A habitat survey of the woolly flying squirrel in Bhutan*. Available at: [https://wwf.panda.org/wwf\\_news/?156701/woolly-flying-squirrel-in-Bhutan](https://wwf.panda.org/wwf_news/?156701/woolly-flying-squirrel-in-Bhutan)
- Roberts TJ. 1997.** *The mammals of Pakistan, revised edn*. Oxford: Oxford University Press.
- Roth VL, Mercer JM. 2015.** Themes and variation in sciurid evolution. In: Cox PG, Hautier L, eds. *Evolution of the rodents: advances in phylogeny, functional morphology and development*. Cambridge: Cambridge University Press, 221–245.
- Saha SS. 1981.** A new genus and a new species of flying squirrel (Mammalia: Rodentia: Sciuridae) from northeastern India. *Bulletin of the Zoological Survey of India* **4**: 331–336.
- Sanamxay D, Douangboubpha B, Bumrungsri S, Xayavong S, Xayaphet V, Satasook C, Bates PJ. 2013.** Rediscovery of *Biswamoyopterus* (Mammalia: Rodentia: Sciuridae: Pteromyini) in Asia, with the description of a new species from Lao PDR. *Zootaxa* **3686**: 471–481.
- Saylor J, Quade J, Dettman D, DeCelles P, Kapp P, Ding L. 2009.** The late Miocene through present paleoelevation history of southwestern Tibet. *American Journal of Science* **309**: 1–42.
- Schaub S. 1953.** Remarks on the distribution and classification of the “Hystricomorpha”. *Verhandlungen der Naturforschenden Gesellschaft in Basel* **64**: 389–400.
- Schaub S. 1958.** Simplicidentata (=Rodentia). In: Piveteau J, ed. *Traité de paléontologie, Vol. 6*. Paris: Masson, 659–818.
- Smith AT, Xie Y. 2008.** *A guide to the mammals of China*. Princeton: Princeton University Press.
- Srinivasulu C, Srinivasulu B. 2012.** *South Asian mammals: their diversity, distribution, and status*. New York: Springer.
- Stamatakis A, Hoover P, Rougemont J. 2008.** A rapid bootstrap algorithm for the RAxML Web servers. *Systematic Biology* **57**: 758–771.
- Sun B-N, Wu J-Y, Liu Y-S(C), Ding S-T, Li X-C, Xie S-P, Yan D-F, Lin Z-C. 2011.** Reconstructing Neogene vegetation and climates to infer tectonic uplift in western Yunnan, China. *Palaeogeography, Palaeoclimatology, Palaeoecology* **304**: 328–336.
- Tamura K, Stecher G, Peterson D, Filipski A, Kumar S. 2013.** MEGA6: molecular evolutionary genetics analysis version 6.0. *Molecular Biology and Evolution* **30**: 2725–2729.
- Thapa S, Katuwal HB, Koirala S, Dahal BV, Devkota B, Rana R, Dhakal H, Karki R, Basnet H. 2016.** *Sciuridae (order: Rodentia) in Nepal*. Kathmandu: Small Mammals Conservation and Research Foundation.
- Thomas O. 1888.** *Eupetaurus*, a new form of flying squirrel from Kashmir. *Journal of the Asiatic Society of Bengal* **57**: 256–260.
- Thorington RW Jr, Hoffmann RS. 2005.** Family Sciuridae. In: Wilson DE, Reeder DM, eds. *Mammal species of the world: a taxonomic and geographic reference*. Washington: Smithsonian Institution Press, 754–818.
- Thorington RW Jr, Koprowski JL, Steele MA, Whatton JF. 2012.** *Squirrels of the world*. Baltimore: Johns Hopkins University Press.
- Thorington RW Jr, Pitassy D, Jansa SA. 2002.** Phylogenies of flying squirrels (Pteromyinae). *Journal of Mammalian Evolution* **9**: 99–135.
- Wan T, He K, Jin W, Liu SY, Chen ZZ, Zhang B, Murphy RW, Jiang XL. 2018.** Climate niche

- conservatism and complex topography illuminate the cryptic diversification of Asian shrew-like moles. *Journal of Biogeography* **45**: 2400–2414.
- Wang C, Dai J, Zhao X, Li Y, Graham SA, He D, Ran B, Meng J. 2014a.** Outward-growth of the Tibetan Plateau during the Cenozoic: a review. *Tectonophysics* **621**: 1–43.
- Wang P, Scherler D, Liu-Zeng J, Mey J, Avouac JP, Zhang Y, Shi D. 2014b.** Tectonic control of Yarlung Tsangpo Gorge revealed by a buried canyon in Southern Tibet. *Science* **346**: 978–981.
- Wang Y, Deng T, Flynn L, Wang X, Yin A, Xu Y, Parker W, Lochner E, Zhang C, Biasatti D. 2012.** Late Neogene environmental changes in the central Himalaya related to tectonic uplift and orbital forcing. *Journal of Asian Earth Sciences* **44**: 62–76.
- Wangchuk T, Thinley P, Tshering K, Tshering C, Yonten D. 2004.** *A field guide to the mammals of Bhutan*. Thimphu: Department of Forestry, Ministry of Agriculture, Royal Government of Bhutan.
- Williams SH, Kay RF. 2001.** A comparative test of adaptive explanations for hypsodonty in ungulates and rodents. *Journal of Mammalian Evolution* **8**: 207–229.
- Yang GR, Wang YX. 1989.** List of rodents and their relationship with diseases in Yunnan. *Chinese Journal of Vector Biology and Control* **5**: 222–229.
- Yang Z, Rannala B. 2010.** Bayesian species delimitation using multilocus sequence data. *Proceedings of the National Academy of Sciences* **107**: 9264–9269.
- Yang Z, Rannala B. 2014.** Unguided species delimitation using DNA sequence data from multiple loci. *Molecular Biology and Evolution* **31**: 3125–3135.
- Yu F. 2002.** *Systematics and biogeography of flying squirrels in the eastern and the western Trans-Himalayas*. Unpublished PhD Thesis, University of Florida.
- Yu F, Yu F, McGuire PM, Kilpatrick CW, Pang J, Wang Y, Lu S, Woods CA. 2004.** Molecular phylogeny and biogeography of woolly flying squirrel (Rodentia: Sciuridae), inferred from mitochondrial cytochrome *b* gene sequences. *Molecular Phylogenetics and Evolution* **33**: 735–744.
- Zahler P. 1996.** Rediscovery of the woolly flying squirrel (*Eupetaurus cinereus*). *Journal of Mammalogy* **77**: 54–57.
- Zahler P. 1998.** The flap over the woolly flying squirrel. *Wildlife Conservation* **101**: 56–57.
- Zahler P. 2001.** The woolly flying squirrel and gliding: does size matter? *Acta Theriologica* **46**: 429–435.
- Zahler P. 2010.** *Eupetaurus cinereus*. IUCN red list of threatened species, Version 2013.1. Available at: [www.iucnredlist.org](http://www.iucnredlist.org)
- Zahler P, Dietemann C. 1999.** A note on food habits of the eagle owl (*Bubo bubo*) in northern Pakistan. *Forktail* **15**: 98–99.
- Zahler P, Karim A. 1998.** Origin of the floristic components of salajit. *Hamdard Medicus: Pakistan Quarterly Journal of Science and Medicine* **41**: 6–8.
- Zahler P, Karim A. 1999.** New distribution, elevation, habitat, and diurnal refuge for the Kashmir flying squirrel (*Eoglaucomys fimbriatus*). *Mammalia* **62**: 588–591.
- Zahler P, Khan M. 2003.** Evidence for dietary specialization on pine needles by the woolly flying squirrel (*Eupetaurus cinereus*). *Journal of Mammalogy* **84**: 480–486.
- Zahler P, Woods CA. 1997.** The status of the woolly flying squirrel (*Eupetaurus cinereus*) in northern Pakistan. In: Mufti SA, Woods CA, Hasan SA, eds. *Biodiversity of Pakistan*. Islamabad: Museum of Natural History and Gainesville: Florida Museum of Natural History, 495–514.
- Zhang J, Kapli P, Pavlidis P, Stamatakis A. 2013.** A general species delimitation method with applications to phylogenetic placements. *Bioinformatics* **29**: 2869–2876.

## SUPPORTING INFORMATION

Additional Supporting Information may be found in the online version of this article at the publisher's web-site:

**Supplementary Data SD1.** Specimens of *Eupetaurus*.

**Supplementary Data SD2.** Primers and polymerase chain reaction conditions for amplification and sequencing used in the genetic analyses.

**Supplementary Data SD3.** GenBank accession numbers for cytochrome *b* (*Cytb*), 12S ribosomal DNA (12S), 16S ribosomal DNA (16S) and interphotoreceptor retinoid-binding protein (*IRBP*) sequences used in this study.

**Supplementary Data SD4.** Character loading and percentage of variance explained on the components of the principal components analysis; morphological measurements from adult specimens of three geographical populations.

**Supplementary Data SD5.** Phylogenetic trees using the nuclear DNA (*IRBP*) dataset. The numbers before the slash represent Bayesian posterior probability (PP), and the numbers after the slash represent maximum-likelihood bootstrap proportions (BP); the asterisk means PP ≥ 0.95 or BP ≥ 75.

**Supplementary Data SD6.** Bayesian species delimitation evaluated using BP&P v.3.1.

**Supplementary Data SD7.** X-Ray photographs of skull of juvenile *Eupetaurus nivamons* (KIZ 034192), showing DP<sup>4</sup>, DP<sub>4</sub> and unerupted P<sup>4</sup> and P<sub>4</sub>.

**Supplementary Data SD8.** Monthly changes of temperature and relative humidity in the Mount Gaoligong habitat of *Eupetaurus nivamons*.
